1 Structural and molecular determinants for the interaction of ExbB from *Serratia marcescens*  
2 and HasB, a TonB paralog.

3  
4 Valérie Biou<sup>1#</sup>, Ricardo Jorge Diogo Adaixo<sup>2</sup>, Mohamed Chami<sup>2</sup>, Pierre-Damien Coureux<sup>3</sup>,  
5 Benoist Laurent<sup>4</sup>, Véronique Yvette Ntsogo Enguéné<sup>1\*</sup>, Gisele Cardoso de Amorim<sup>5\*</sup>, Nadia  
6 Izadi-Pruneyre<sup>5</sup>, Christian Malosse<sup>6</sup>, Julia Chamot-Rooke<sup>6</sup>, Henning Stahlberg<sup>2\*</sup>, Philippe  
7 Delepelaire<sup>1#</sup>

8 1: Laboratoire de Biologie Physico-Chimique des Protéines Membranaires, Université de  
9 Paris, UMR 7099 CNRS, F-75005, Paris, France.

10 Institut de Biologie Physico-Chimique, F-75005, Paris, France.

11 2: Center for Cellular Imaging and NanoAnalytics, Biozentrum, University of Basel,  
12 Mattenstrasse 26, CH-4058, Basel, Switzerland

13 3: Laboratoire de Biologie Structurale de la Cellule, BIOC, UMR7654 CNRS/Ecole  
14 polytechnique, Palaiseau France

15 4: Plateforme de Bioinformatique, Université de Paris, FRC 550 CNRS, F-75005, Paris,  
16 France.

17 Institut de Biologie Physico-Chimique, F-75005, Paris, France.

18 5: Structural Bioinformatics Unit, Department of Structural Biology and Chemistry, C3BI,  
19 Institut Pasteur, CNRS UMR3528, CNRS USR3756, Paris, France.

20 6: Mass Spectrometry for Biology Unit, CNRS USR 2000, Institut Pasteur, 75015 Paris,  
21 France

22

23 Running title: Interaction specificity between ExbB and TonB/HasB

24

25

26 For correspondence: # Valérie Biou, [valerie.biou@ibpc.fr](mailto:valerie.biou@ibpc.fr),

27 # Philippe Delepelaire, [philippe.delepelaire@ibpc.fr](mailto:philippe.delepelaire@ibpc.fr)

28

29 \* Present addresses:

30 Véronique Yvette Ntsogo Enguéné: Department of Biochemistry, University of Cambridge,  
31 Tennis Court Road, Cambridge CB2 1GA, UK

32 Gisele Cardoso de Amorim: Instituto de Bioquímica Médica, Universidade Federal do Rio de  
33 Janeiro, Rio de Janeiro, RJ, Brasil.

34 Henning Stahlberg: Centre d'imagerie Dubochet UNIL-EPFL-UNIGE & Laboratoire de  
35 microscopie électronique biologique UNIL-EPFL, Lausanne, Switzerland

36

37

38 **Abstract.**

39 ExbB and ExbD are cytoplasmic membrane proteins that associate with TonB to convey the  
40 energy of the proton-motive force to outer membrane receptors in Gram-negative bacteria for  
41 iron uptake. The opportunistic pathogen *Serratia marcescens* (*Sm*) possesses both TonB and a  
42 heme-specific TonB paralog, HasB. ExbB<sub>Sm</sub> has a long periplasmic extension absent in other  
43 bacteria such as *E. coli* (*Ec*). Long ExbB's are found in several genera of Alphaproteobacteria,  
44 most often in correlation with a *hasB* gene. We investigated specificity determinants of ExbB<sub>Sm</sub>  
45 and HasB. We determined the cryo-EM structures of ExbB<sub>Sm</sub> and of the ExbB-ExbD<sub>Sm</sub> complex  
46 from *S. marcescens*. ExbB<sub>Sm</sub> alone is a stable pentamer, and its complex includes two ExbD  
47 monomers. We showed that ExbB<sub>Sm</sub> extension interacts with HasB and is involved in heme  
48 acquisition and we identified key residues in the membrane domain of ExbB<sub>Sm</sub> and ExbB<sub>Ec</sub>,  
49 essential for function and likely involved in the interaction with TonB/HasB. Our results shed  
50 light on the new class of inner membrane energy machinery formed by ExbB,ExbD and HasB.

51

## 52 **Introduction**

53

54 Transport of nutrients across the Gram-negative outer membrane is either a diffusion-facilitated  
55 or an active process. In the latter case, the process is powered by the energy of the proton-  
56 motive force (pmf) transmitted through the periplasm to specialized outer membrane (OM)  
57 transporters (the so-called TBDT's, TonB dependent transporters). A complex of three  
58 cytoplasmic membrane proteins, TonB, ExbB and ExbD, that together form the TonB complex  
59 (see (1) for a review) conveys the energy of the pmf to the TBDT. In *Escherichia coli* K12,  
60 there is only one set of *tonB*, *exbB* and *exbD* genes, whereas there are nine TBDT's (2), all  
61 energized by the same complex. ExbB and ExbD respectively belong to the MotA-TolQ-ExbB  
62 and MotB-TolR-ExbD protein families. Those proteins are involved in power generation and  
63 transmission in various processes (MotAB drives flagellar rotation, the ExbB-ExbD complex  
64 referred to as ExbBD energises active transport of molecules across OM receptors and TolQR  
65 is involved in cell division), at the expense of pmf dissipation across the cytoplasmic membrane  
66 (3-6). They form complexes that associate respectively with the flagellar rotor, TonB and TolA.  
67 It has also been shown that ExbD does not accumulate in the absence of ExbB, and that TonB  
68 does not accumulate in the absence of the ExbBD complex (7). The C-terminal domains of  
69 TonB and ExbD reside in the periplasm and interact with each other (8, 9). ExbD TM (Trans-  
70 Membrane segment) has one strictly conserved aspartate residue (10), which is thought to  
71 undergo cycles of protonation/deprotonation (coupled to pmf dissipation) and is essential to its  
72 function.

73 TBDT's comprise a 22-stranded  $\beta$ -barrel anchored in the outer membrane. An N-terminal  
74 domain folded inside the barrel, and called the plug, contains the main region of interaction  
75 with TonB, the so-called TonB box, located in the N-terminal periplasm-exposed part of TBDT.

76 The N-terminus of TonB is localized in the cytoplasm, followed by a single transmembrane  
77 segment, and by a Pro-Lys rich region long enough to span the periplasmic space and ends with  
78 a structured C-terminal domain interacting with the TBDT TonB box. The substrate binds the  
79 extracellular side of the TBDT receptor, triggering conformational changes that are transmitted  
80 to the periplasmic side and allow the interaction between TonB and the TonB box of the TBDT,  
81 leading to the substrate entry into the periplasm by a yet unknown mechanism. A rearrangement  
82 of the plug domain has been proposed to occur creating a path for the substrate across the  
83 TBDT.

84 In *Serratia marcescens*, a close relative of *E. coli*, in which about twenty potential TBDT's  
85 were identified, there are at least two TonB homologs: an ortholog of TonB<sub>Ec</sub> (48% aminoacid  
86 identity with TonB<sub>Ec</sub>(11)) and HasB, a TonB paralog that is strictly dedicated to its cognate  
87 outer membrane receptor HasR(12, 13). HasB has the same topology as TonB, and its C-  
88 terminal domain interacts specifically with HasR with a circa (ca.) 40-fold higher affinity than  
89 the corresponding TonB domain (14). The Has (heme acquisition system) system includes the  
90 TBDT HasR, which recognizes both free heme and the high-affinity extracellular heme-binding  
91 HasA hemophore. HasB is encoded within the *has* locus and displays low sequence identity  
92 with either *E. coli* or *S. marcescens* TonB. The Has system has been functionally reconstituted  
93 in *E. coli*. Unlike TonB<sub>Sm</sub>, HasB could not complement TonB<sub>Ec</sub> functions (12), nor was it able  
94 to drive heme entry *via* the HasR receptor in the presence of ExbBD<sub>Ec</sub>. A gain of function  
95 mutation in the TM domain of HasB was however isolated in *E. coli*, restoring heme entry *via*  
96 HasR in the presence of ExbBD<sub>Ec</sub> (12). This mutation corresponds to a 6 base-pair duplication  
97 leading to a longer TM segment for HasB by inserting AL into CLVLVLALHLLVAALLWP  
98 resulting in CLVLVLALALHLLVAALLWP.



99 Recently several structures of *E. coli* ExbB and ExbBD have been solved, either by X-ray  
100 crystallography or cryo-EM(14-16). All samples studied included ExbB and ExbD, but not all  
101 showed an ordered structure of ExbD. In these structures, ExbB<sub>Ec</sub>(14) appeared as a pentamer.  
102 Each monomer of ExbB has three TM helices that extend into the cytoplasm, and with a highly  
103 polarized charge distribution on the cytoplasmic side. The central pore is apolar, lined by TM  
104 helices 2 and 3 of each monomer, creating a large hydrophobic cavity inside the structure.  
105 Another study using X-ray crystallography, single-particle cryo-EM and electron diffraction on  
106 two-dimensional crystals concluded that ExbB could undergo a pH-dependent pentamer to  
107 hexamer transition, and that the hexameric ExbB could accommodate three ExbD TM segments  
108 in its pore (15). A more recent cryo-EM study of ExbBD reconstituted in nanodiscs however  
109 confirmed the ExbB<sub>5</sub>ExbD<sub>2</sub> stoichiometry with two TM helices of ExbD identified in the ExbB  
110 pore (16). This is consistent with previous DEER (Double Electron Electron Resonance) results  
111 (15). Similarly, *Pseudomonas savastanoi* ExbBD exhibits the same stoichiometry (17).  
112 Structures of the flagellar MotAB motor complexes (related to ExbBD) from several bacteria  
113 (*Campylobacter jejuni*, *Bacillus subtilis*, *Clostridium sporogenes*, *Vibrio mimicus*, *Shewanella*  
114 *oneidensis*, PomAB from *Vibrio alginolyticus*) were recently published. They all display a  
115 MotA<sub>5</sub>MotB<sub>2</sub> stoichiometry and share some topology elements with ExbBD complex (17, 18).  
116 The discovery of HasB and its functional specificities prompted us to identify the ExbBD  
117 complex that would function with it in *S. marcescens*. In this study, we identified the  
118 orthologous ExbBD<sub>Sm</sub> and found that this complex is active with both HasB and TonB. We  
119 characterised a new family of ExbB proteins with a long N-terminal extension whose presence  
120 is strongly correlated to the presence of a *hasB* gene ortholog in the genome. We purified  
121 ExbB<sub>Sm</sub> alone and ExbBD<sub>Sm</sub> and determined their structures by single-particle cryo-EM at 3.1  
122 and 3.96Å resolution, respectively. We show that in both cases, ExbB<sub>Sm</sub> behaves as a stable

123 pentamer; in the ExbBD<sub>Sm</sub> complex, we observe two TM helices of ExbD<sub>Sm</sub> in the pore of ExbB  
124 pentamer, as it was shown for the *E. coli* case. Using NMR measurements, we also show that  
125 the N-terminal periplasmic extension specific to ExbB<sub>Sm</sub> interacts with the C-terminal globular  
126 domain of HasB. Finally, *via* mutagenesis studies and bacterial growth assays, we show that  
127 the first transmembrane helix TM1 of ExbB contains specificity determinants for interaction  
128 with HasB/TonB and that the periplasmic extension of ExbB does play a role in heme  
129 acquisition *via* the Has system.

130

## 131 **Results**

### 132 **1. Orthologs of *E. coli* *exbB* and *exbD* in *Serratia marcescens* define a new ExbB family** 133 **with an N-terminal extension.**

134 Sequence analysis of strain Db11, a fully sequenced *S. marcescens* isolate (GenBank: *Serratia*  
135 *marcescens* subsp. *marcescens* Db11, complete genome. ACCESSION HG326223,  
136 <https://www.ncbi.nlm.nih.gov/nucore/HG326223.1>), identified one putative operon encoding  
137 orthologs of *E. coli* ExbB and ExbD (SMDB11\_3479(ExbD) and SMDB11\_3480(ExbB)). In  
138 *E. coli*, the *exbBD* operon is surrounded on the 5' side, and in the opposite direction, by *metC*  
139 (encoding a cystathionine lyase) and on the 3' side by *yhgA* (encoding an aldehyde reductase).  
140 In *S. marcescens* Db11, the *exbB*-like gene is close to and in the opposite orientation to a *metC*  
141 homolog, as in *E. coli*. At the 3' end of the operon, and in the opposite direction there are genes  
142 related to sucrose metabolism. Comparison of the coding sequences indicated that the *exbD*  
143 gene encoded a 140 residue-long protein (71% identity with the 141 residue-long *E. coli*  
144 sequence). In contrast, the putative *exbB* gene encodes a much longer protein than its *E. coli*  
145 counterpart (325 residues instead of 244 residues in *E. coli*, 73% identity in the common part).  
146 The additional stretch of residues present in ExbB<sub>Sm</sub> is located at the N-terminus and

147 corresponds to a putative signal peptide followed by a ~50 residue N-terminal extension of the  
148 mature protein (Figure 1A).

149 A BLAST search (19) on bacterial genomes indicated that such “extralong” ExbB’s are found  
150 in different Gammaproteobacteria, including *Serratia*, *Yersinia*, *Pseudomonas*,  
151 *Erwinia/Dickeya*, and many genera in the Alphaproteobacteria class. Table I lists representative  
152 species of Alphaproteobacteria in which such long ExbB’s are found. Interestingly, about 90%  
153 of the long ExbB-containing species listed in this table also have a *hasB* gene ortholog.  
154 An alignment of these ExbB aminoacid sequences (represented as a Logo on Figure 1B) also  
155 shows that the mature N-terminal extensions are of variable lengths between a few and 150  
156 residues with an average of 50 residues. These extensions are quite rich in Ala (24,6%) and Pro  
157 (14,5%) residues and therefore likely to be unstructured but could be involved in protein-protein  
158 interactions as proline-rich regions often are in signalling processes (20-22).

159 The Conserved Domain Database (23) currently contains two ExbB subfamilies in the cI00568  
160 MotA\_ExbB superfamily, TIGR02797 (containing *E. coli* ExbB, as well as longer ExbB’s) and  
161 TIGR02805 (containing *Haemophilus influenzae* ExbB, with a very short cytoplasmic domain  
162 between TM1 and TM2). Based on sequence data, TIGR02797 can be divided into 2 groups:  
163 those with “extralong” ExbB’s in one subfamily, and *E. coli*-like sequences in the other. Along  
164 with the existence of HasB in the bacterial species, the identification of this N-terminal addition  
165 prompted us to further characterise the ExbB-ExbD complex from *S. marcescens*.

166

167 **2. ExbBD<sub>Sm</sub> complements ExbBD<sub>Ec</sub> for iron acquisition and functionally associates with**  
168 **both TonB and HasB for heme acquisition through HasR.**

169

170 As a first step in the characterization of the identified ExbBD<sub>Sm</sub>, we tested whether this complex  
171 complements ExbBD<sub>Ec</sub>. To this end, the plasmids pBADExbBD<sub>Sm</sub> and pBADExbBD<sub>Ec</sub> were  
172 constructed, introducing the two genes from *S. marcescens* or *E. coli*, into pBAD24 vector  
173 under the control of arabinose-inducible *P<sub>araBAD</sub>* promoter. By using growth under iron  
174 starvation conditions as a test, we could show that *exbBD<sub>Sm</sub>* complements *exbBD<sub>Ec</sub>*. The *E. coli*  
175 C600Δ*exbBD* strain is indeed more sensitive than its wild-type counterpart to iron starvation  
176 (induced for example by the Fe<sup>2+</sup> chelator dipyrityl, DiP) as ExbBD are required to transduce  
177 pmf to TonB for siderophore uptake. Its growth in the presence of DiP is restored by the  
178 expression of either pBADExbBD<sub>Ec</sub> or pBADExbBD<sub>Sm</sub> (Figure 2).

179 We then tested the functionality of ExbBD<sub>Sm</sub> in heme acquisition via the Has system  
180 reconstituted in a heme auxotroph *E. coli* strain. To avoid interference from the chromosomal  
181 *exbBD* operon and from *tonB*, we used the C600Δ*hemA*Δ*exbBD* and the  
182 C600Δ*hemA*Δ*exbBD*Δ*tonB* strains, transformed with various recombinant plasmid pairs, one  
183 bringing the complete Has locus, with or without the *hasB* gene, the other one with the *exbBD*  
184 operon or its derivatives under the control of the *P<sub>araBAD</sub>* promoter. In this kind of experiment,  
185 the bacterial growth reflects both the expression of the various Has components under the  
186 control of their own regulatory elements (24), and the efficiency of the heme uptake process  
187 itself. Two kinds of tests were carried out, one on solid substrate in Petri dishes, allowing to see  
188 haloes of bacterial growth around wells punched in the agar and containing the heme source,  
189 the other one in liquid medium in microplates with an absorbance plate reader, allowing to  
190 record growth at regular intervals over extended periods. The latter type of tests allows a more  
191 precise and quantitative description of the phenotypes as it is realized in a homogeneous  
192 medium, which is not the case with Petri dishes. Six strains were constructed: one set deleted  
193 from TonB C600Δ*hemA*Δ*exbBD*Δ*tonB* (pAMHasISRADEB + pBAD24),

194 *C600ΔhemAΔexbBDΔtonB* (pAMHasISRADEB + pBADExbBD<sub>Ec</sub>),  
195 *C600ΔhemAΔexbBDΔtonB* (pAMHasISRADEB + pBADExbBD<sub>Sm</sub>), and one set with TonB  
196 *C600ΔhemAΔexbBD* (pAMHasISRADE + pBAD24), *C600ΔhemAΔexbBD* (pAMHasISRADE  
197 + pBADExbBD<sub>Ec</sub>), and *C600ΔhemAΔexbBD* (pAMHasISRADE + pBADExbBD<sub>Sm</sub>). The  
198 ExbBD constructs for Ec and Sm are schematized on the first two lines of Figure 3A. The  
199 results are reported in Figures 3B (Petri dishes, overnight observation), 3C (Petri dishes, 36h  
200 observation) and 3D (microplates, recording over 66h). As expected, control strains (with  
201 pBAD24) did not grow. ExbBD<sub>Sm</sub> was functional with both HasB and TonB (middle series of  
202 holes in Figure 3C indicated with orange and blue dots, and orange and blue dots curves in  
203 Figure 3D), although with quite dramatically different kinetics and yield, the onset of growth  
204 occurring at 5-6hrs for the HasB-ExbBD<sub>Sm</sub> pair, and at 22-23hrs for the TonB-ExbBD<sub>Sm</sub> pair.  
205 Moreover, the final OD of TonB-ExbBD<sub>Sm</sub> is half that of HasB-ExbBD<sub>Sm</sub>. Under our  
206 experimental setup, ExbBD<sub>Ec</sub> was also functional with both TonB and more surprisingly with  
207 HasB (bottom series of holes in Figure 3C, and green and grey dots curves in Figure 3D), the  
208 onset of growth occurred at around 15-16hrs for TonB, and 18hrs for HasB; however, the  
209 maximal OD was lower for the HasB-ExbBD<sub>Ec</sub> pair (0.43 vs. 0.72). Finally, the ExbBD<sub>Sm</sub>-  
210 HasB pair seems less sensitive to iron starvation than all the other ones, since similar results  
211 are obtained at 100 and 200μM Dipyrityl (Figure 3B), which is not the case for the other pairs,  
212 as already observed in the TonB-ExbBD<sub>Ec</sub> case (25). These results might seem at odds with the  
213 previous results obtained on HasB (12) which showed that HasB was nonfunctional with  
214 ExbBD<sub>Ec</sub>. However, the experimental setup was quite different, both in terms of plasmids used,  
215 strains and conditions of observation. Therefore, ExbBD<sub>Sm</sub> is the *E. coli* ExbBD ortholog, able  
216 to associate both with HasB and TonB<sub>Ec</sub>.

217

218 **3. Characterization of ExbB<sub>Sm</sub> and ExbBD<sub>Sm</sub>: Specific function of the N-terminal**  
219 **extension of ExbB<sub>Sm</sub>**

220 **3.a Purification and mass-spectrometry analyses of protein and associated lipids**

221 To gain further insight into the possible differences between ExbBD<sub>Sm</sub> and ExbBD<sub>Ec</sub>, we  
222 purified both ExbB<sub>Sm</sub> and ExbBD<sub>Sm</sub> (as C-terminal 6-His-tagged proteins on ExbB for ExbB  
223 purification, and C-terminal 6-His tag on ExbD for ExbBD purification, see Materials and  
224 Methods section) in LMNG (lauryl maltose neopentyl glycol) micelles (Figure 4, A and B).  
225 Both ExbB<sub>Sm</sub> and ExbBD<sub>Sm</sub> appear as homogeneous oligomers at the last size exclusion  
226 chromatography (SEC) step.

227 Mass spectrometry analysis showed that purified ExbD<sub>Sm</sub>His6 has a mass of 16 131 Da close  
228 to its theoretical mass of 16261.7 Da. Purified ExbB<sub>Sm</sub> has a measured mass of 29 557 Da and  
229 its predicted mature sequence has a theoretical mass of 29556.8 Da. Together with the  
230 determination of the first amino-acid residue for ExbB, this confirmed that the predicted signal  
231 sequence of ExbB<sub>Sm</sub> is absent from the mature sequence and has therefore been processed. It  
232 also showed that ExbD initial Met residue was cleaved off (see Supplementary Figure S1).  
233 More interestingly, mass spectrometry analysis of chloroform/methanol extracts of the purified  
234 proteins also showed that both complexes contained native lipids (Supplementary Figure S2),  
235 mostly phosphatidylglycerol (PG) and phosphatidylethanolamine (PE), and that ExbBD also  
236 contained some cardiolipin (CL) (Supplementary Figure S3). Further analysis of aliphatic chain  
237 composition of lipids shows evidence of specific composition with a majority of PG with 34  
238 carbons and 2 unsaturations (Supplementary Figure S4). Considering that the ExbBD<sub>Sm</sub>  
239 complex is functional in *E. coli*, and that the phospholipid composition of *S. marcescens* is quite  
240 similar to that of *E. coli* (26), this affinity for lipids may disclose a specific recognition that  
241 may be important for the function.

242 **3b NMR shows an interaction between HasB<sub>CTD</sub> and ExbB<sub>Sm</sub> periplasmic extension.**

243 The presence in ExbB<sub>Sm</sub> of an N-terminal extension residing in the periplasm led us to  
244 investigate its function. This extension contains more than 50% of Ala and Pro residues and is  
245 predicted to be unstructured by disorder prediction servers such as IUPRED2 (27). Indeed,  
246 NMR analysis of a 44 residue-long synthetic peptide corresponding to this extension (ExbB<sub>Sm</sub>  
247 1-44) did not show any indication of secondary structure (our unpublished results). Since this  
248 region is predicted to be in the periplasm where the C-terminal domain of HasB, HasB<sub>CTD</sub> is  
249 also located, we investigated the potential interaction of the ExbB<sub>Sm</sub> 1-44 synthetic peptide with  
250 HasB<sub>CTD</sub> by NMR. The analysis of chemical shift perturbations (CSP) of amide resonances of  
251 HasB<sub>CTD</sub> upon addition of the peptide, showed that the chemical environment of their  
252 corresponding residues was modified because of their interaction (Figure 5 A and  
253 Supplementary Figure S5). Perturbed residues are mainly located on the helical face of HasB<sub>CTD</sub>  
254 forming a continuous surface of interaction (Figure 5B and 5C) (R175, R178-K180, K184,  
255 Q192, T200, L201, Q204, H206, A232, A240, G246). Interestingly, this face is on the opposite  
256 side of the third beta strand of HasB that was previously shown to interact with HasR (28). In  
257 addition, the residues of a small pocket at the C-terminus of HasB (D255, R259) show also high  
258 CSP and might be involved in the interaction with ExbB or subject to a conformation change  
259 induced by this interaction.

260

261 **3c An ExbB<sub>Sm</sub> mutant devoid of the N-terminal extension is affected in its function.**

262 To assess the potential function of the N-terminal periplasmic extension of ExbB<sub>Sm</sub>, we  
263 engineered a ExbB<sub>Sm $\Delta$ extss</sub> mutant lacking this extension (Figure 3A) (see Materials and  
264 Methods for details) and tested its effect on the growth of a *C600 $\Delta$ hemA $\Delta$ exbBD $\Delta$ tonB* strain  
265 harbouring plasmids pAMHasISRADEB and pBADexbBD<sub>Sm</sub> or its derivatives in liquid

266 culture. We observed that the lag between the start of the experiment and the onset of growth  
267 is at least 2 hours longer for the ExbB<sub>Smdelextss</sub> mutant strain, as compared to the WT strain  
268 (Figure 6A, compare orange and yellow curves) and a control strain (medium blue). In addition,  
269 the maximum OD reached after growth is slightly but significantly decreased (Figure 6 A). To  
270 ensure that this difference was not due to a difference of expression of the two constructs, we  
271 compared their amounts in membrane preparations by immunodetection. As our anti-ExbB<sub>Sm</sub>  
272 antibody was not sensitive enough for this measurement, we used the His-tagged version of  
273 ExbB<sub>Sm</sub> readily detectable with anti-His6 antibodies. Coomassie blue stained SDS-PAGE  
274 showed that the 3 conditions have similar total amounts of protein (Figure 6B). The Western  
275 blot shows that the amount of the ExbB<sub>SmHis6</sub> variant deleted of its N-terminal extension is at  
276 least equal, if not slightly higher, to the amount of the wild-type protein (Figure 6C, lanes 2 and  
277 3), ruling out a possible decrease in protein concentration. The N-terminal periplasmic  
278 extension of ExbB<sub>Sm</sub>, is therefore likely involved in the functioning of the Has system, whether  
279 at the transcription activation of the Has locus, and/or at any later step.  
280



281 **4 ExbB<sub>Sm</sub> and ExbBD<sub>Sm</sub> structural analysis by cryo-EM show ExbB<sub>5</sub> and ExbB<sub>5</sub>D<sub>2</sub>**  
282 **stoichiometries.**

#### 283 **4a ExbB<sub>Sm</sub> structure**

284 As ExbB<sub>Sm</sub> presented specific features compared to ExbB<sub>Ec</sub>, we set out to determine its structure  
285 by single-particle cryo-EM, see Material and Methods for details. The 3D class average model  
286 clearly showed a pentameric structure. It was refined and polished to obtain a resolution of 3.1 Å  
287 using the Fourier shell correlation (FSC) gold-standard criterion at 0.143. Maps were refined  
288 with and without C5 symmetry and showed a 98% correlation in density. Therefore, we chose  
289 to use the map based on C5 symmetry for model building.

290 The structure solved here and shown in Figure 7 A (side view) and B (cytoplasm view), has the  
291 same  $\alpha$ -helix bundle topology and is very similar to that of *E. coli* ExbB 5SV0 structure (that  
292 was co-purified with ExbD but did not show any ordered density for ExbD (14)), with a 1.3 Å  
293 root mean square deviation (rmsd) over all C $\alpha$  atoms (Table II). This shows that ExbB<sub>Sm</sub> is  
294 stable as a pentamer on its own. The periplasmic N-terminal extension did not yield any visible  
295 density, precluding its structure determination. At the C-terminus of each monomer, however,  
296 density was clearly defined, allowing structure determination for an additional 10 residues in a  
297 helical conformation up to the last one (helix  $\alpha$ 8 finishing with Gly 283, see Figure 7C) before  
298 the His-tag that is present but disordered. In the 5SV0 X-ray structure, a calcium ion, present  
299 in the crystallisation solution, is bound to the five Glu 106 (of helix  $\alpha$ 2 in the TM region) on  
300 the cytoplasmic side. In ExbB<sub>Sm</sub>, this residue is replaced by an Asn, and we do not observe any  
301 density that could be assigned to a metal ion.

302  
303 The structure of the whole pentamer with one monomer coloured as a function of sequence  
304 conservation in this sub-class of ExbB (Supplementary Figure S6) shows that the highest

305 residue conservation is inside the transmembrane channel, indicative of high functional  
306 constraints, while the TM residues located at the membrane surface are more variable. The  
307 same observation was made for ExbB sequences lacking N-terminal signal sequence and  
308 periplasmic extension (14).

309 The cryo-EM density of ExbB<sub>Sm</sub> shows vents located at the interface of adjacent monomers and  
310 at the height of the cytoplasmic junction with the inner membrane leaflet (Figure 7A). These  
311 vents may allow solvent or ion passage. Additional density was also clearly observed on the  
312 external surface, and we attributed it to the phospholipids present in the preparation. Each ExbB  
313 monomer appears to be associated with the equivalent of two PG molecules, located at the inner  
314 leaflet of the cytoplasmic membrane (Figure 7A, D and E). However, we were able to model  
315 only one PG molecule per monomer with confidence. Three PE (phosphatidylethanolamine, the  
316 major *E. coli* phospholipid) molecules and one PG molecule were identified as associated to  
317 the ExbBD pentamer in the *E. coli* complex after reconstitution in nanodiscs (16). The cryoEM  
318 density map, when displayed at a level that shows the detergent belt, shows density inside the  
319 ExbB membrane pore (supplementary figure S7A). This density is too noisy to allow model  
320 building (supplementary figure S7B). However, it corresponds to a region with positive  
321 electrostatic charge on the top and bottom of the pore and neutral or hydrophobic in the middle  
322 (supplementary figure S7C). This density could be due to the presence of lipid or detergent.  
323 Interestingly, it is located at a different height as compared to the detergent belt and external  
324 lipids. In summary, our cryo-EM structure shows that ExbB<sub>Sm</sub> is stable as a pentamer and  
325 associates strongly with specific phospholipids coming from the inner leaflet of the membrane.

#### 326 **4b ExbBD<sub>Sm</sub> structure**

327 We also solved the structure of the ExbBD<sub>Sm</sub> complex by cryo-EM (Figure 8 and Table II). As  
328 for ExbB, the purified complex exhibited a symmetric peak on SEC (see Figure 4, B). Cryo-

329 EM data were collected and processed as described in the Material and Methods section. In  
330 contrast to ExbB<sub>Sm</sub>, 2D classes showed preferential orientations with 92% top views and only  
331 8% side views. Due to this strong bias in particle orientation, the resolution achieved was 3.96  
332 Å, precluding reliable positioning of the side chains. However, our ExbB<sub>Sm</sub> model fitted readily  
333 into the density. As observed for ExbB<sub>Sm</sub> alone, in the ExbB<sub>Sm</sub> complex, ExbB<sub>Sm</sub> behaves as  
334 a pentamer, and no sign of other assemblies was found. Similarly, no density could be attributed  
335 to the periplasmic extension. Two clear densities inside the ExbB<sub>Sm</sub> pore were assigned to the  
336 pair of ExbD<sub>Sm</sub> TM segments (Figure 8 B and C). The charge distribution is highly polarised  
337 on the cytoplasmic side: the region close to the membrane is positively charged and the distal  
338 part is negatively charged as observed for ExbB<sub>Ec</sub> (Supplementary Figure S8A). The central  
339 pore of ExbB<sub>Sm</sub> is apolar, lined by TM helices 2 and 3 of each monomer, creating a large  
340 hydrophobic cavity inside the structure (Supplementary Figure S8B). The ExbD helices were  
341 initially oriented similarly to ExbD<sub>Ec</sub> in structure 6TYI and remained stable during refinement.  
342 Interestingly, the ExbD TM helices are at the same height as the density observed in the pore  
343 of ExbB alone, and closer to the periplasm than the membrane bilayer. In the refined model,  
344 Asp 25 from ExbD<sub>Sm</sub> monomer chain G faces Thr 218 from ExbB<sub>Sm</sub> chain C, while Asp 25  
345 from the ExbD<sub>Sm</sub> chain F faces the interface between two ExbB<sub>Sm</sub> monomers A and E  
346 (Supplementary Figure S8C and D). The estimation of pKa, by using the program Propka (29)  
347 server, shows that Asp 25 has a pKa of 7.3 for chain F and 7.4 for chain G, both very peculiar  
348 for solvent-accessible acidic residues but that can be found in buried active sites or membrane  
349 proteins (30). This pKa should allow protonation and deprotonation of ExbD Asp 25 at  
350 physiological pH.

351 As compared to the structure of ExbB<sub>Sm</sub>, there is a slight «opening» towards the periplasmic  
352 side (the distance of Ala 197 from one subunit to Leu 204 of the facing subunit varying from

353 25.5Å in ExbB<sub>Sm</sub> to 29.8Å in ExbBD<sub>Sm</sub>, much greater than any error expected due to the  
354 difference in resolution of the two structures). This opening of the structure is limited to the  
355 periplasmic part (Supplementary Figure S9). The rmsd between ExbB<sub>Sm</sub> alone and in complex  
356 with ExbD<sub>Sm</sub> is 2Å over all C $\alpha$  of the pentamer, and the rmsd between ExbB<sub>Sm</sub> in complex with  
357 ExbD<sub>Sm</sub> and ExbB<sub>Ec</sub> in complex with ExbD<sub>Ec</sub> (structure 6TYI chains A-E) is 1.7Å.  
358 As compared to the 6TYI structure of *E. coli* ExbBD complex, we observe significant  
359 differences that may be related to the specificity of function of ExbB<sub>Sm</sub>. Both ExbB<sub>Sm</sub> and  
360 ExbBD<sub>Sm</sub> inner pores are slightly wider than their *E. coli* counterparts at the periplasmic  
361 entrance. Consequently, two channels cross the membrane region, (extending from the  
362 periplasmic entrance to the Asp 25 residue from the ExbD TM deeply embedded in the ExbB  
363 pore) that are clearly seen in the ExbBD<sub>Sm</sub> (as detected by the MoleOnline (31) Server, Figure  
364 9, A and C; the average diameter is around 3Å) while the *E. coli* structure exhibits a single,  
365 much thinner channel as detected with the same parameters of MoleOnline (Figure 9, B and D;  
366 average diameter around 2Å). It is therefore possible that this structure represents another state  
367 of the ExbBD motor complex, whereby the periplasmic side allows solvent access to the Asp  
368 25 residue of ExbD TM. The different physico-chemical conditions (nanodiscs vs. detergent  
369 micelles, 200 vs. 100mM NaCl, pH7,4 vs. pH8) might also influence such parameters.  
370 In summary, we show that ExbBD from *S. marcescens* has a 5:2 stoichiometry with a larger  
371 channel allowing solvent or proton transport from the periplasmic side as compared with the *E.*  
372 *coli* structure.

373  
374 **5. Swapping residues in TM1 between ExbB<sub>Sm</sub> and ExbB<sub>Ec</sub> strongly suggests that ExbB**  
375 **TM1 interacts with HasB/TonB.**

376 As already mentioned, TBDT function requires a productive association between TonB or its  
377 orthologs/paralogs with ExbBD complexes. It is known that the periplasmic domains of ExbD  
378 and TonB interact, and there are both genetic and structural pieces of evidence for the  
379 interaction between the TM helix of TonB and the first TM helix of ExbB. Our experimental  
380 system gave us the opportunity to investigate the specificity determinants between HasB/TonB  
381 and ExbB. Previous work (12) lends support to the absence of interaction between HasB and  
382 ExbBD<sub>Ec</sub>. However, our data rather favor a less efficient interaction between HasB and  
383 ExbBD<sub>Ec</sub> than with ExbBD<sub>Sm</sub>. *E. coli* can grow with the HasB-ExbBD<sub>Ec</sub> pair, although more  
384 slowly and with a lower yield: the final OD was 0.78 for HasB-ExbBD<sub>Sm</sub> and 0.43 for HasB-  
385 ExbBD<sub>Ec</sub> (Figure 3 D orange and grey curves). As it is known that ExbBD is required to  
386 stabilize TonB, we first tested whether HasB was stabilized by ExbBD. We could show that,  
387 although HasB does not accumulate in the absence of ExbBD, it is readily present in comparable  
388 amounts with either ExbBD<sub>Sm</sub> or ExbBD<sub>Ec</sub> (Figure 10). This observation therefore indicates  
389 that most likely HasB also interacts with ExbBD<sub>Ec</sub> so as to be stabilized (i. e., withstanding  
390 proteolytic degradation), but in a less functional manner than with ExbBD<sub>Sm</sub>.

391 A general framework put forward for the Mot complexes indicates that MotA (equivalent of  
392 ExbB) rotation around MotB (equivalent of ExbD) drives the rotation of the flagellum basal  
393 ring (17, 18). We tested the possibility that ExbB residues exposed at the surface of the protein  
394 might be involved in a functional interaction with HasB/TonB, as has been proposed in the case  
395 of the TonB-ExbBD complex from *P. savastanoi* (17). The superposition of residue  
396 conservation on the structure of ExbB showed that the membrane-facing residues of the TM  
397 region of helix  $\alpha 2$  and the cytoplasmic residues were the least conserved (Figures 1 and S6).  
398 We noted one conspicuous stretch of residues located in the cytoplasmic leaflet of TM helix 1  
399 (see Supplementary Figure S6):

400 residues 76–88 of ExbB<sub>Sm</sub> TILFAKGSELLRA corresponding to  
401 residues 39–51 of ExbB<sub>Ec</sub> AIFFSKSVEFFNQ  
402 (identical residues are underlined) that is the least conserved one between the two proteins. In  
403 this stretch, the conserved I, K and E residues point toward the innermost part of the protein  
404 and the non-conserved residues point to the outside and are available for protein-protein  
405 interaction (Figure 11 E and F).

406 We speculated that this region of ExbB might establish interaction with HasB. We made a  
407 chimeric ExbB<sub>Ec</sub> protein, with its 39-51 region replaced by residues 76-88 from ExbB<sub>Sm</sub>, named  
408 ExbB<sub>Ec-Sm76-88</sub>, and asked how this chimeric ExbB<sub>Ec</sub> protein would allow growth in the presence  
409 of HasB (see Figure 3A for the constructions), as compared to ExbB<sub>Ec</sub>. As shown in Figure 6A,  
410 this chimeric protein ExbB<sub>Ec-Sm76-88</sub> (green dots) was more active with HasB than ExbB<sub>Ec</sub> (grey),  
411 the onset of growth took 14hrs compared to 18hrs for ExbB<sub>Ec</sub> and the maximum OD was 0.74  
412 compared to 0.43 for ExbB<sub>Ec</sub>. We also made the inverse change where the 76-88 region of  
413 ExbB<sub>Sm</sub> was replaced by the 39-51 region from ExbB<sub>Ec</sub> (ExbB<sub>Sm-Ec39-51</sub>, magenta). This mutant  
414 has a degraded behaviour as compared to ExbB<sub>Sm</sub>, since the onset of growth occurs at 19hrs  
415 compared to 6hrs, and the final OD is 0.47, compared to 0.78. To better locate the region  
416 responsible for specificity, we produced one additional mutant where only residues 76-84  
417 (TILFAKGSE) from ExbB<sub>Sm</sub> were exchanged for residues 39-47 (AIFFSKSVE) from ExbB<sub>Ec</sub>  
418 yielding ExbB<sub>Ec-Sm76-84</sub> (see Figure 3 A). ExbB<sub>Ec-Sm76-84</sub> was quite comparable to ExbB<sub>Ec-Sm76-88</sub>  
419 (see deep-blue and green curves on Figure 6A). This 9-residue stretch is therefore sufficient to  
420 alter ExbB<sub>Ec</sub> to be better adapted to HasB. This set of experiments shows that the  
421 intramembrane functional zones of ExbB are crucial for the growth of *E. coli* in our  
422 experimental set up and therefore likely govern the interaction between ExbB and HasB.

423 In summary, we showed using NMR and culture growth assays that ExbB<sub>Sm</sub> N-terminal  
424 extension (section 3b) and a few residues in the  $\alpha$ 2 helix TM region (section 5) are likely  
425 involved in specific interactions with HasB.

426

## 427 **Discussion**

428 1) ExbBD<sub>Sm</sub> is a 5:2 complex at pH 8.

429 Our structures were solved at pH 8, and examination of the 2D class averages only showed  
430 pentameric structures and not hexameric ones, contrarily to what has been observed in the  
431 Maki-Yonekura study, where ExbB was mostly seen as a hexamer in the high pH regime (15).  
432 In their study, the solubilizing detergent was DDM, that was subsequently exchanged for either  
433 C8E4 or C10E5. These shorter chain detergents might have led to some destabilization of the  
434 pentameric structure and provoked the conversion to the hexameric form. Our data agree with  
435 those published by Lloubes, Buchanan et al. (14, 16). *In vivo*, a stoichiometry of 7ExbB, 2ExbD  
436 and 1TonB has been determined in *E. coli* (32). Although one cannot completely rule out some  
437 bias in this indirect measurement, a physiologically relevant reason for an excess of ExbB  
438 would be to provide a permanent scaffold to which TonB and/or ExbD could associate with,  
439 upon TonB complex dissociation, that might occur during the catalytic cycle, as has already  
440 been proposed (33).

441 2) ExbB and ExbBD are co-purified with endogenous lipids.

442 In their last study, Celia *et al.* reconstituted ExbBD from *E. coli* into nanodiscs with added  
443 phospholipids from *E. coli*, and found mostly PE bound to ExbBD (16). It is unclear whether  
444 this phospholipid was a genuine tightly bound, co-purified lipid or whether it came from the  
445 lipids added during reconstitution in the nanodiscs. In our case, we did not add any lipid and  
446 our mass spectrometry identification of co-purified lipids found mostly PG and some PE in the

447 ExbB case (and CL for ExbBD). The cryo-EM structure shows that they are located in the inner  
448 leaflet, as in the *E. coli* complex. PG and CL are negatively charged, whereas PE is zwitterionic.  
449 This might be pertaining to the functioning of the complex, as the lipids are bound to a highly  
450 positively charged interface, very close to the fenestrations seen in the structure and PE might  
451 therefore be less tightly bound than PG or CL. Further analysis by mass spectrometry of the  
452 aliphatic chains of the lipids present in our sample also revealed a specific composition in their  
453 length and unsaturated nature.

454 One point also worth mentioning is the existence of “channels” inside the ExbBD tunnel,  
455 potentially allowing the passage of proton/hydronium ion up to the Asp 25 residue of ExbD,  
456 deeply embedded in the apolar medium of ExbB, and therefore with a pKa close to  
457 physiological pH, allowing easy protonation/deprotonation steps of Asp 25 side chain. The  
458 identified channels connect the cytoplasm to the periplasm *via* Asp 25, allowing us to propose  
459 a possible trajectory for the proton transfer via those channels.

### 460 3) Motor model proposal

461 Regarding the coupling of the pmf dissipation with the mechanical work carried out by  
462 MotAB/TolQR/ExbBD complexes, several models have been put forward that might be more  
463 or less easy to reconcile with the structural data. A detailed mechanism was proposed for *C.*  
464 *jejuni* MotAB complex, where cycles of protonation/deprotonation of the conserved Asp of the  
465 MotB TM (equivalent to the conserved Asp 25 of the ExbD TM) are coupled to the rotation in  
466 discrete steps of the MotA pentamer around MotB axis, provided that the periplasmic domain  
467 of MotB is anchored to the peptidoglycan layer *via* its peptidoglycan binding site (18). Our  
468 ExbBD structure indeed shows that ExbD monomers have two orientations relative to ExbB:  
469 Asp 25 from one monomer faces Thr 208 of ExbB and Asp 25 from the second monomer faces  
470 a hydrophobic region at the interface of two ExbB monomers. In the first state previously



471 protonated Asp25 could be deprotonated in contact with polar Thr208 while the second,  
472 deprotonated Asp 25, could pick a proton from the periplasm via the channel. Rotation of the  
473 the ExbB pentamer around the two ExbD chains would then lead to a new  
474 protonation/deprotonation cycles accompanied by a change in the environment upon rotation.  
475 How is this rotative energy conveyed to the TBDT?

476 The binding of an iron-loaded substrate on the extracellular binding site of a TBDT triggers a  
477 reaction cascade ultimately leading to the substrate entry into the periplasm. The inner  
478 membrane TonB(HasB) complex conveys the energy of the pmf to the TBDT most likely by a  
479 rearrangement of the plug inside the barrel to allow substrate access to the periplasm and its  
480 capture by periplasmic binding proteins. Specific interactions between the TonB(HasB) box of  
481 the receptor and the C-terminal domain of TonB(HasB) are essential in this process (28). A  
482 wealth of data has also accumulated documenting specific interactions between TonB<sub>CTD</sub> and  
483 ExbD<sub>CTD</sub>, depending upon the energy state of the cell. It is also known that ExbD and TonB  
484 interact *via* their periplasmic parts (34) and in particular residue 150 of TonB (positioned just  
485 upstream the C-terminal globular domain) can make cross-links to the C-terminal domain of  
486 ExbD (35). There have also been indications and suggestions that both TonB<sub>CTD</sub> and ExbD<sub>CTD</sub>  
487 could interact with the peptidoglycan sacculus, providing anchor points to allow force  
488 transmission. Molecular modelling works hypothesized that the C-terminal domain of TonB  
489 (36) and the C-terminal domain of ExbD (37) have specific binding sites for the peptidoglycan  
490 network. Atomic force microscopy experiments also showed that by exerting a pulling force on  
491 the C-terminal domain of TonB bound to the BtuB TBDT, a partial unfolding of the TBDT plug  
492 occurs, potentially leading to the entry of the substrate in the periplasm (38). Our NMR results  
493 also show that ExbB interacts *via* its alanine and proline-rich periplasmic N-terminal region  
494 with the HasB periplasmic domain on the side opposite to that of the TonB box interaction, thus

495 rendering a tripartite interaction possible. Our *in vivo* growth results with the ExbB<sub>Smdel</sub> mutant  
496 mutant devoid of the periplasmic extension point to a possible role of the N-terminal  
497 periplasmic extension in the activation of the transcription of the Has locus (figure 6).  
498 The MotA-MotB model also posits that MotA outer region interacts with the rotor of the  
499 flagellum and thus that MotA rotation drives the rotation of the flagellum. Similarly, the MotAB  
500 rotating model can be extrapolated to the ExbBD complex. In this model, ExbB would rotate  
501 around ExbD, driving the rotation of TonB/HasB thanks to the specific interaction between  
502 TonB/HasB TM and ExbB TM  $\alpha 2$ . This kind of interaction is supported by our mutagenesis  
503 data, as we could strongly increase the efficiency of ExbB<sub>Ec</sub> with HasB by exchanging a short  
504 stretch of residues between ExbB<sub>Smdel</sub> and ExbB<sub>Ec</sub>. It is also in line with a previous TonB TM  
505 point mutant partially suppressed by an ExbB  $\alpha 2$  point mutant (39). Structure comparison of  
506 the swapped regions shows that ExbB<sub>Smdel</sub> has smaller residues that may be better accommodated  
507 and less specific than the *E. coli* sequence (Figure 11, compare structures on figures 11C and  
508 11D and helical wheels on figures 11E and 11F). Similar interactions have been proposed by  
509 Deme et al. on the TonBExbBD complex from *P. savastanoi* (17), where an extra cryo-EM  
510 density is seen outside the ExbB pentamer and was tentatively assigned to the TM domain of  
511 TonB. The residues from ExbB<sub>Ec</sub> TM1 (S34 and A39) identified as co-evolving with TonB TM  
512 region (18) are only a little deeper in the bilayer than the residues we exchanged between  
513 ExbB<sub>Ec</sub> TM1 (39-51) and ExbB<sub>Smdel</sub> TM1, that are closer to the cytoplasm. More specifically,  
514 whereas S34 is conserved between ExbB<sub>Ec</sub> and ExbB<sub>Smdel</sub> (S71), A39 is replaced by T76.  
515 Moreover, the hydrophobic core of HasB TM is likely shorter than that of TonB as seen in the  
516 sequence alignment of HasB and TonB TM domains:  
517

518 HasBSmTM 18–39 RRC---LVLVLALH-LLVAALLWPRR  
519 TonBSmTM 10–34 RRISVPPFVLSVGLHSALVAGLLYAS-  
520 TonBEcTM 7–31 RRFWPPTLLSVCIHGAVVAGLLYTS-  
521 consensus RR L LH VA LL

522  
523 This difference in length might influence the orientation of HasBTM inside the bilayer and  
524 potentially explain the gain of function of HasB6 mutant (in which the hydrophobic core has  
525 two more residues (39)) to be better suited to ExbB<sub>Ec</sub> than HasB. The presence of a proline  
526 residue in the TonB TM may also change its shape and the interaction with ExbB.

527 Several models have been proposed to account for the functioning of the TonB complex, in  
528 conjunction with the entry of a substrate bound to the extracellular side of a given receptor. In  
529 a first model, piston-like movements of TonB drive the unfolding of the plug inside the receptor  
530 barrel. *In vivo* proteolysis studies indicated that the C-terminal domain of TonB can change  
531 conformations during the catalytic cycle of protonation and deprotonation of the conserved Asp  
532 residue in ExbD TM (40). In addition, the periplasmic linker between the TM helix and the C-  
533 terminal domain of TonB is rich in Pro and Lys residues and might adopt an extended  
534 conformation of a sufficient length to span the periplasm (41). We therefore propose a model  
535 in which the force generated through the rotation of HasB/TonB, driven by ExbB rotation  
536 around ExbD, is not directly transmitted to the TonB box of the receptor, but could be mediated  
537 by the C-terminal domain of ExbD, that might act as an anchor point allowing force  
538 transmission and converting the rotation into a pulling force exerted on the TonB/HasB box of  
539 the receptor. Further studies are needed to test this model, in particular concerning protein-  
540 peptidoglycan interactions, the force needed to trigger TBDT plug opening, and how to  
541 distinguish between a rotation and a piston movement. Finally, given the wide range of lag  
542 periods we observe in our growth curves using different combinations of ExbB TM1 mutants

543 and TonB/HasB, one may hypothesize that the membrane interaction between ExbB and  
544 TonB/HasB influences the rate of transcription activation of the Has locus.  
545 It is likely that the *in vivo* entry of a siderophore is a rather slow process: during a cell division  
546 time a bacterial cell must take up ca. 300000 iron atoms from its surroundings. Under full  
547 induction, there are roughly 10-15000 FepA siderophore receptors per cell and 1500 TonB  
548 complexes (32), meaning that each receptor has to undergoes 20 cycles during a generation  
549 estimated to 30 minutes, leading to a turnover time of the TonB complex of about 5-10 seconds.  
550 As compared to flagellar motor that can operate at extremely high speeds (several hundred of  
551 rotations per second), even though the basic mechanisms are likely to be conserved with the  
552 ExbBD/TonB-HasB complex, it is much slower, which likely points to different coupling  
553 mechanisms.

554  
555

## 556 **Material and Methods**

557

### 558 **Strains and plasmid construction**

559 Strains, plasmids, and oligonucleotides used are shown Table III.

560 -Plasmid pBADExbBD<sub>Sm</sub> was constructed after amplification on the genomic DNA from strain  
561 *S. marcescens* Db11 of a ca. 1.42kb fragment using primers ExbBDSm5' and ExbBDSm3'.  
562 The PCR product was purified digested with *EcoRI* and *SphI*, and ligated with pBAD24  
563 digested with *EcoRI* and *SphI*. Correct clones were selected after sequencing of the insert.

564 -Plasmid pBADExbBD<sub>Sm</sub>His6 (encoding ExbB<sub>Sm</sub> and a C-terminally His-tagged version of  
565 ExbD<sub>Sm</sub>) was constructed by first amplifying on pBADExbBDSm a ca. 0.4kb fragment with  
566 the following oligonucleotides SphIHisCtexbD<sub>Sm</sub> and BglIIexbD<sub>Sm</sub>; after amplification, the  
567 fragment was purified, digested with *BglII* and *SphI*, and ligated with pBADExbBDSm digested

568 with the same enzymes. The correct clones were selected after sequencing of the insert. In  
569 biological tests, this plasmid was undistinguishable from its parent plasmid pBADExbBDSm.  
570 -Plasmid pBADExbBD<sub>Ec</sub> was constructed by amplification on genomic MG1655 DNA of a ca.  
571 1.7kb fragment with the following oligonucleotides ExbBD5c, and ExbBD3c; the PCR product  
572 was purified, digested with *EcoRI* and *SphI*, and ligated with pBAD24 digested with the same  
573 enzymes. Correct clones were selected after sequencing.

574 -Plasmid pBADExbB<sub>Sm</sub>His6 (encoding a C-terminally His-tagged version of ExbB<sub>Sm</sub>) was  
575 constructed as follows: a PCR fragment was amplified on pBADExbBDSm with the oligos  
576 PBADFOR and ExbBHis6, digested with *EcoRI* and *SphI*, and ligated with pBAD24 digested  
577 with the same enzymes. Correct clones were selected by sequencing.

578 Plasmid pBADExbBD<sub>Ec-Sm76-88</sub> (encoding a chimeric ExbB<sub>Ec</sub> protein with its 39-51 residues  
579 exchanged for the 76-88 residues from ExbB<sub>Sm</sub> and ExbD<sub>Ec</sub>) was constructed as follows:  
580 Plasmid pBADExbBD<sub>Ec</sub> was amplified with the two following 5' phosphorylated  
581 oligonucleotides: ExbBEcSm76-88.1 and ExbBEcSm76-88.2. After digestion with *DpnI* and  
582 self-ligation, correct clones were selected by sequencing and the mutated fragments recloned  
583 in pBAD24.

584 Plasmid pBADExbBD<sub>Ec-Sm76-84</sub> (encoding a chimeric ExbB<sub>Ec</sub> protein with its 39-47 residues  
585 exchanged for the 76-84 residues from ExbB<sub>Sm</sub> and ExbD<sub>Ec</sub>) was constructed in the same  
586 manner, with the following oligonucleotides pairs: ExbBEcSm 76-84.1 and ExbBEcSm 76-  
587 84.2.

588 In the same manner, plasmid pBADExbBD<sub>Sm-Ec39-51</sub> (encoding a chimeric ExbB<sub>Sm</sub> protein with  
589 its 76-88 residues exchanged for the residues 39-51 from ExbB<sub>Ec</sub> and ExbD<sub>Sm</sub>) was constructed  
590 by PCR on the pBADExbBD<sub>Sm</sub> plasmid with the following couple of 5' phosphorylated  
591 oligonucleotides: ExbBSmEc39-51.1 and ExbBSmEc39-51.2.

592 Plasmid pBADExbBD<sub>Smdelextss</sub> (encoding ExbB<sub>Sm</sub> deleted of its periplasmic extension and  
593 ExbD<sub>Sm</sub>) was constructed similarly, by using as a template pBADExbBD<sub>Sm</sub>, with the two  
594 phosphorylated oligonucleotides ExbBdelextss1 and ExbBdelextss2.

595 To construct pBADExbB<sub>Smdelextss</sub>His6, a ca. 0.6kb *EcoRI-KpnI* fragment from  
596 pBADExbBD<sub>Smdelextss</sub> was exchanged for the corresponding fragment of pBADExbBHis6.

597 Plasmid pAMHasISRADEB (encoding HasI, HasS, HasR, HasA, HasD, HasE and HasB), was  
598 constructed by digesting pAMHasISRADE (encoding HasI, HasS, HasR, HasA, HasD and  
599 HasE) and pSYC7 (encoding HasD, HasE and HasB) (42) by *KpnI* and *HindIII*, and purifying  
600 fragments of respectively ca. 9 and 7 kbases, ligating them together to obtain a plasmid with  
601 the whole *has* locus on a low copy number plasmid (pAM238) under the control of its  
602 endogenous regulation signals (a fur box upstream of *hasI* and *hasR*, the *hasI* and *hasS* genes  
603 respectively encoding the has specific sigma and anti-sigma factors, and the hasS box upstream  
604 of *hasS* and *hasR*).

605 All constructions were carried out in *E. coli* strain XL1-Blue.

606 Strains and other plasmids used in this study are shown in Table III and are from the laboratory  
607 collection.

608

### 609 **Protein expression and purification**

610 The BL21DE3(pExbBD<sub>Sm</sub>His6/pBAD24) or BL21DE3(pExbB<sub>Sm</sub>His6/pBAD24) were grown  
611 at 37°C either in TB or MDM medium, and induced with 0.2% arabinose at 1.5-2OD<sub>600nm</sub>  
612 (TB) or 5-6OD<sub>600nm</sub> (MDM) and the incubation continued for 3hrs. The cells were harvested  
613 by centrifugation (10000g 20minutes 4°C), washed once in 20mMTris-HCl pH8.0, flash-frozen  
614 in liquid N<sub>2</sub> and kept at -80°C. Cells were broken in a Cell disruptor (Constant, UK) at 1kbar  
615 (10g of cells in 40ml final of 20mM Tris pH 8.0 containing protease inhibitor (Roche, EDTA

616 free), at 4°C. Benzonase was added and after ca. 15 minutes, the solution was centrifuged for  
617 1hr at 100000g at 4°C. The pellet (crude membrane preparation) was resuspended in 20mM  
618 Tris pH 8.0 plus protease inhibitor cocktail (Roche EDTA free), flash-frozen in liquid N<sub>2</sub> and  
619 kept at -80°C.

620 The crude membrane preparation was solubilized in 20mM Tris pH 8.0, 20mM Imidazole,  
621 100mM NaCl, 10% Glycerol, 0.8% LMNG (10g of equivalent whole-cell pellet solubilized in  
622 40ml), plus protease inhibitor cocktail (Roche EDTA-free) for 30 minutes at 15°C. After  
623 centrifugation (1hr 100000xg), the supernatant was incubated with 2.5ml Ni-Agarose beads  
624 (Thermo-Fisher His-Pure Ni-NTA #88222) preequilibrated with the same buffer except for the  
625 detergent concentration (0.0015% LMNG). After three hours of incubation on a rotating wheel  
626 at 4°C, the beads were washed three times with 25ml of pre-equilibration buffer and then eluted  
627 with two times 25ml of the pre-equilibration buffer containing 200mM Imidazole. The eluate  
628 was concentrated and washed on 100kDa cut-off centrifugal device, in pre-equilibration buffer  
629 without NaCl and Imidazole. The resulting sample was loaded on a monoQ HR10-100 column  
630 equilibrated with 20mM Tris pH 8.0, 10% glycerol, 0.0015%LMNG and eluted with a gradient  
631 from 0 to 1M NaCl in the same buffer. Peak fractions were collected and concentrated as before.  
632 The concentrated sample was then loaded on a Superose 6 increase column equilibrated with  
633 20mM Tris pH8.0, 100mM NaCl, 0.0015%LMNG. The peaks fractions were collected,  
634 concentrated and their concentration determined by using the theoretical absorption coefficient  
635 of either ExbB5D2 ( $113790\text{M}^{-1}\text{cm}^{-1}$ ), or ExbB5 ( $104850\text{M}^{-1}\text{cm}^{-1}$ ). They were then kept frozen  
636 at -80°C in aliquots until use. The SEC profiles as well as a gel of a representative sample after  
637 purification are shown in Figure 4. Previous attempts with DDM instead of LMNG yielded  
638 similar results, and LMNG was chosen, owing to its very low CMC and its lower background  
639 in cryo-EM.

640

## 641 **Activity tests**

642 Three types of tests were used, either in liquid medium or on agar plates.

643 1. Growth tests in liquid medium: *E. coli* C600 and its  $\Delta exbBD$  derivatives were transformed  
644 with specified plasmids and their growth tested in liquid LB medium at 37°C, at various  
645 dipyriddy concentrations to induce iron starvation. OD<sub>600nm</sub> was measured after overnight  
646 growth.

647 2. Growth tests on plates: the relevant plasmids were also transformed into *E. coli* C600  $\Delta hemA$ ,  
648 a heme auxotroph strain (and derivatives thereof), and growth of the strains was assayed as  
649 follows. Briefly, cells were first grown in LB medium (supplemented with delta-aminolevulinic  
650 acid (50µg/ml) to bypass the effect of the  $\Delta hemA$  mutation) at 37°C up to an OD<sub>600nm</sub> of 1, and  
651 then mixed with melted top agar (0.6% agar in LB), and poured onto LB agar plates containing  
652 the appropriate antibiotics with arabinose at a concentration of 40µg/ml to induce expression  
653 of the genes under the *P<sub>araBAD</sub>* promoter(43). Wells, punched with Pasteur pipettes were filled  
654 with heme-albumin (at 5, 1 or 0.2µM), at two dipyriddy concentrations (100 or 200µM) to  
655 induce iron starvation. Plates were incubated overnight at 37°C and scored for growth around  
656 the wells. All experiments were performed in triplicate.

657 3. Growth curves in liquid medium: a few colonies of *E. coli* C600  
658  $\Delta hemA\Delta tonB\Delta exbBD$ (pAMHasISRADEB + pBAD24 or derivatives thereof) were first  
659 inoculated in 4ml of LB medium at 37°C with the corresponding antibiotics, and 100µM  
660 dipyriddy, 4µg/ml arabinose but without delta-aminolevulinic acid. Once the culture reached an  
661 OD<sub>600nm</sub> of ca. 1.2-1.5, it was diluted and inoculated in 48 well Greiner plates, in the same  
662 medium to which was added 0.4µM He-BSA, as a heme source. The initial OD<sub>600nm</sub> of the  
663 cultures was 0.001. Each well contained 300µl of growth medium. Duplicates of each strain



664 were made, and the plate was incubated at 37°C with vigorous shaking (500rpm) in a Clariostar  
665 Plus Microplate reader. OD<sub>600nm</sub> was recorded every 30 minutes for 60-70 hours.

666

### 667 **N-terminal sequencing**

668 The N-terminus of ExbB<sub>Sm</sub> was determined at the Plateforme Protéomique de l'institut de  
669 microbiologie de la Méditerranée (Marseille), after blotting on a PVDF membrane of a purified  
670 sample of ExbBD<sub>His6</sub> run on SDS-PAGE and determined to be APAAN.

### 671 **Lipid extraction**

672 Chloroform (0.20 mL) and methanol (0.40 mL) were sequentially added to a sample of the  
673 ExbB or ExbBD complex (0.1 mL). The sample was vortexed for 10 min at room temperature  
674 and chloroform (0.2 mL) and water (0.2 mL) were further added. The organic phase was  
675 collected and the extraction procedure was repeated on the remaining aqueous phase. Combined  
676 organic layers were evaporated to dryness under argon and stored at -20 °C.

### 677 **Mass Spectrometry**

678 Dry lipid extracts obtained from ExbB, the ExbBD complex or from an *E. coli* lysate were  
679 solubilized in chloroform/methanol (50/50). Samples were then nano-electrosprayed using a  
680 TriVersa NanoMate (Advion Biosciences, Ithaca, USA) coupled to a Synapt G2-Si mass  
681 spectrometer (Waters Corporation, Manchester, UK). The instrument was calibrated in negative  
682 ion mode (for lipids) and positive ion mode (for proteins) from 50 m/z to 2000 m/z with NaI  
683 (50 mg/ml) with an accuracy of 0.8 ppm in resolution mode. The following settings were  
684 chosen: sampling cone 40 V, source offset 40 V, source temperature 80°C, trap gas flow 5  
685 mL/min, helium cell gas flow 180 mL/min. MS/MS spectra were recorded using CID (Collision

686 Induced Dissociation) with a normalized collision energy set up to 30. To measure the mass of  
687 the intact proteins of the ExbBD and purified ExbB complexes, a desalting step was performed  
688 using micro Bio-Spin™ 6 (BIO-RAD) with 500mM ammonium acetate. Both samples were  
689 analyzed in denaturing conditions after a two-fold dilution with acetonitrile 4% formic acid.  
690 Mass spectra were acquired in positive ion mode. All molecular weights were measured after  
691 MaxEnt1 software deconvolution into neutral species.

### 692 **Cryo-EM grid preparation and data acquisition**

693 3  $\mu$ L of either purified ExbB<sub>Sm</sub> or ExbBD<sub>Sm</sub> complex at ca. 1 mg/mL was applied to C-Flat  
694 1.2/1.3 holey carbon grids (Protochips Inc., USA) previously glow-discharged in air for 30s.  
695 Grids were blotted for 2s at blot force 1 and vitrified in liquid ethane using a Vitrobot mark IV  
696 (FEI company) operated at 10 °C and 100% relative humidity.

697 All data collection was performed with a Titan Krios (ThermoFisher Scientific) operated at 300  
698 kV equipped with a K2 Summit direct electron detector (ThermoFisher Scientific) at the  
699 European synchrotron research facility, ESRF (Grenoble, France). Movies were recorded in  
700 electron counting mode with EPU software (ThermoFisher Scientific), aligned with  
701 MotionCorr2 (44) and aligned images were processed with Gctf (45) using Scipion  
702 interface(46).

703 For ExbB data collection, 4567 movies were collected at a magnification of 165000x with a  
704 nominal pixel size of 0.827Å using a defocus range from -1.5 to -2.5 $\mu$ m. Movies of 56 frames  
705 were acquired using a dose rate of 8 electrons/Å<sup>2</sup>/second over 7 seconds, yielding a cumulative  
706 exposure of 55.95 electrons/Å<sup>2</sup>.

707 For ExbBD data collection, 4043 movies were collected at a nominal magnification of 139000  
708 x with a pixel size of 1.067Å. Movies of 48 frames were acquired using a dose rate of 4.6  
709 electrons/Å<sup>2</sup>/second over 12 seconds yielding a cumulative exposure of 55.2 electrons/Å<sup>2</sup>.

710

## 711 **Cryo-EM image processing and analysis**

### 712 **a) ExbB**

713 For ExbB, aligned movies were processed with Gctf (45) and only images with a resolution  
714 higher than 4Å were kept; after visual inspection of the remaining images, processing was  
715 carried out with Relion-3 (47) (Supplementary Figure S10). Particles were extracted using a 2-  
716 fold binning, issued from a manual picking and a 2-D classification of particles picked out from  
717 50 images. Automatic extraction was performed using the selected 2D class averages. After  
718 several rounds of 2D and 3D classification, 161k particles were selected for 3D refinement.  
719 They were corrected for local motion using Bayesian polishing option in Relion-3 and a post-  
720 refined map produced a 3.1Å overall resolution with a 5-fold symmetry.

721 A homology model was built with the *Serratia marcescens* ExbB sequence using Phyre2 server  
722 from 5SV0 monomer and docked into the refined map. Refinement was done with Phenix Real  
723 Space Refine option with secondary structure, “non-crystallographic symmetry” and  
724 Ramachandran restraints (48) and graphically adjusted with Coot (49). Lipid phosphatidyl  
725 glycerol starting structure and geometry were built using Phenix eLBOW (50) and was fit in  
726 the map using Coot then refined along with the protein model in Phenix.real\_space\_refine.

727

### 728 **b) ExbBD**

729 The data processing is summarised in Supplementary Figure S11. Movies were drift-corrected  
730 and dose-weighted using MotionCorr2 (44). Aligned dose weighted averages were imported

731 into Cryosparc2 (51) and contrast transfer function was estimated using CTFFIND4.1 (52).  
732 Micrographs with poor CTF estimation statistics or high drift profiles were discarded. The  
733 remaining 3028 micrographs were used for automated particle picking. Particles were extracted,  
734 Fourier cropped to 2 Å/px and 2D classified. The best 2D classes were used as templates for  
735 automated particle picking resulting in 1.3 million particles. After several rounds of  
736 classification, the best 600k particles were submitted to 3D classification by means of multi-  
737 class ab-initio Reconstruction and Heterogeneous Refinement. 158 k particles belonging to the  
738 best resolved classes were corrected for local motion, re-extracted and used in Non-Uniform  
739 Refinement. The resulting refined map has a nominal resolution of 4.56 Å.  
740 Based on the previous map a soft mask lining the micelle was designed in UCSF Chimera (53)  
741 and used to signal subtract the corresponding micelle density of particles in the refined map.  
742 Localized refinement of the signal subtracted particles produced a map of the complex with an  
743 estimated resolution of 3.96 Å judging by FSC at 0.143 criterion. Data have been deposited  
744 both at the EMDB and PDB databases (EMDB 10789 and 11806, PDB 6YE4 and 7AJQ, for  
745 ExbB<sub>Sm</sub> and ExbBD<sub>Sm</sub> respectively, see Table II for refinement statistics).  
746 Unless otherwise specified, the structure figures were made using UCSF Chimera software  
747 (53).

748

## 749 **NMR experiments**

750 The C-terminal periplasmic domain of HasB, HasB<sub>CTD</sub> comprising residues 133-263, was  
751 produced and purified as previously reported (28, 54). The peptide corresponding to the  
752 periplasmic extension of ExbB<sub>sm</sub>  
753 (A<sub>1</sub>PAANPAVTESVAPTTAPAPAAAAPESITPVNPAPTIQPPETRG<sub>44</sub>- numbering with  
754 reference to the mature protein) was synthesized by *Proteogenix*.

755 NMR experiments were acquired at 293 K on a 600 MHz Bruker Avance III spectrometer  
756 equipped with a TCI cryoprobe. The spectra were processed with NMRpipe (55) and analyzed  
757 with CcpNmr Analysis 2.4 software (56). Proton chemical shifts were referenced to 2,2-  
758 dimethyl-2-silapentane-5 sulfonate as 0 ppm.  $^{15}\text{N}$  were referenced indirectly to DSS (57)  
759 (Wishart et al., 1995).  $^1\text{H}$ - $^{15}\text{N}$  HSQC experiments were acquired on 0.15 mM HasB<sub>CTD</sub> in  
760 50mM sodium phosphate pH 7, 50 mM NaCl with or without the peptide. Aliquots from a  
761 solution of peptide at 25mg/ml in the same buffer were added to the protein sample at 2:1 and  
762 10:1 ratios. Chemical shift perturbations (CSPs) of backbone amide cross-peaks were  
763 quantified by using the equation  $\text{CSP} = [\Delta \delta\text{H}^2 + (\Delta \delta\text{N} \times 0.15)^2]^{1/2}$ , where  $\Delta \delta\text{H}$  and  $\Delta \delta\text{N}$  are  
764 the observed  $^1\text{H}$  and  $^{15}\text{N}$  chemical shift differences between the two experimental conditions.  
765 The  $^1\text{H}$  and  $^{15}\text{N}$  resonance assignments were from Lefevre et al 2007 (58).

766

#### 767 **Other biochemical methods**

768 SDS-PAGE and immunodetection with anti-HasB or anti-His6 antibodies (Abcam [HIS.H8]  
769 (ab18184)) on whole cells or membrane preparations were carried out following standard  
770 protocols. Secondary antibodies were coupled to alkaline phosphatase.

771

#### 772 **BLAST search**

773 ExbB<sub>Sm</sub> was used as a search for BLAST for orthologs in complete bacterial genomes, focusing  
774 on “long” ExbB’s. Top hits were in *Serratia*, *Yersinia*, *Dickeya*, *Erwinia* and *Pseudomonas*.  
775 Those genera were later excluded from successive BLAST searches to obtain orthologs in other  
776 genera with higher p-value.

777

#### 778 **Author contribution**

779 PD and VB conceived the study and wrote the manuscript. all authors contributed to the  
780 manuscript and approved it. PD produced protein samples and performed microbiology  
781 experiments. MC performed electron microscopy sample screening and data collection. RJDA,  
782 PDC, VYNE and VB processed cryo-EM data. VB built structural models. VB and PD  
783 interpreted models. BL installed and tested programs. CM and JCR performed mass spec  
784 analyses. NIP and GCA performed NMR analyses. HS provided advice with data collection  
785 and processing.

786

### 787 **Data availability**

788 Protein structures were deposited to the protein data bank with ID 6YE4 and 7AJQ. Electron  
789 microscopy maps were deposited to the EMDB with ID 10789 and 11806.

790

791 **Acknowledgments** This work was supported by grants from the ANR  
792 (HEMESTOCKEXCHANGE ANR-12-BSV3-0022-01 and LABEX DYNAMO ANR-11-  
793 LABEX-0011-01). We thank Nathalie Dautin for helpful suggestions and critical reading of the  
794 manuscript, as well as Andrew Thompson. We acknowledge Emmanuel Frachon and  
795 Christophe Thomas from the Institut Pasteur platform “Production of recombinant proteins” for  
796 large scale cultures used in this work, European Synchrotron Radiation Facility for the  
797 provision of time on the Titan Krios at beamline CM01, the Institut Pasteur Biological NMR  
798 Technological Platform for the use of the NMR spectrometers, the staff at the ESRF CM01  
799 facility in Grenoble for help in the data collection, the staff at the Marseille proteomics facility  
800 and Djalila Djouadi and Diana Basto who initially contributed to this project. We thank M.  
801 Nilges for interest in this work and B. Miroux for constant support.

802

803

804

805 **References**  
806

- 807 1. Noinaj N, Guillier M, Barnard TJ, Buchanan SK. 2010. TonB-dependent transporters:  
808 regulation, structure, and function. *Annu Rev Microbiol* 64:43-60.
- 809 2. Grinter R, Lithgow T. 2019. The structure of the bacterial iron-catecholate transporter  
810 Fiu suggests that it imports substrates via a two-step mechanism. *J Biol Chem*  
811 294:19523-19534.
- 812 3. Cascales E, Lloubes R, Sturgis JN. 2001. The TolQ-TolR proteins energize TolA and  
813 share homologies with the flagellar motor proteins MotA-MotB. *Mol Microbiol*  
814 42:795-807.
- 815 4. Braun V. 1989. The structurally related *exbB* and *tolQ* genes are interchangeable in  
816 conferring tonB-dependent colicin, bacteriophage, and albomycin sensitivity. *J*  
817 *Bacteriol* 171:6387-90.
- 818 5. Eick-Helmerich K, Braun V. 1989. Import of biopolymers into *Escherichia coli*:  
819 nucleotide sequences of the *exbB* and *exbD* genes are homologous to those of the *tolQ*  
820 and *tolR* genes, respectively. *J Bacteriol* 171:5117-26.
- 821 6. Braun V, Herrmann C. 1993. Evolutionary relationship of uptake systems for  
822 biopolymers in *Escherichia coli*: cross-complementation between the TonB-ExbB-  
823 ExbD and the TolA-TolQ-TolR proteins. *Mol Microbiol* 8:261-8.
- 824 7. Fischer E, Gunter K, Braun V. 1989. Involvement of ExbB and TonB in transport  
825 across the outer membrane of *Escherichia coli*: phenotypic complementation of *exb*  
826 mutants by overexpressed *tonB* and physical stabilization of TonB by ExbB. *J*  
827 *Bacteriol* 171:5127-34.
- 828 8. Ahmer BM, Thomas MG, Larsen RA, Postle K. 1995. Characterization of the *exbBD*  
829 operon of *Escherichia coli* and the role of ExbB and ExbD in TonB function and  
830 stability. *J Bacteriol* 177:4742-7.
- 831 9. Higgs PI, Myers PS, Postle K. 1998. Interactions in the TonB-dependent energy  
832 transduction complex: ExbB and ExbD form homomultimers. *J Bacteriol* 180:6031-8.
- 833 10. Braun V, Gaisser S, Herrmann C, Kampfenkel K, Killmann H, Traub I. 1996. Energy-  
834 coupled transport across the outer membrane of *Escherichia coli*: ExbB binds ExbD  
835 and TonB in vitro, and leucine 132 in the periplasmic region and aspartate 25 in the  
836 transmembrane region are important for ExbD activity. *J Bacteriol* 178:2836-45.
- 837 11. Gaisser S, Braun V. 1991. The *tonB* gene of *Serratia marcescens*: sequence, activity  
838 and partial complementation of *Escherichia coli tonB* mutants. *Mol Microbiol* 5:2777-  
839 87.
- 840 12. Paquelin A, Ghigo JM, Bertin S, Wandersman C. 2001. Characterization of HasB, a  
841 *Serratia marcescens* TonB-like protein specifically involved in the haemophore-  
842 dependent haem acquisition system. *Mol Microbiol* 42:995-1005.
- 843 13. Benevides-Matos N, Wandersman C, Biville F. 2008. HasB, the *Serratia marcescens*  
844 TonB paralog, is specific to HasR. *J Bacteriol* 190:21-7.
- 845 14. Celia H, Noinaj N, Zakharov SD, Bordignon E, Botos I, Santamaria M, Barnard TJ,  
846 Cramer WA, Lloubes R, Buchanan SK. 2016. Structural insight into the role of the  
847 Ton complex in energy transduction. *Nature* 538:60-65.
- 848 15. Maki-Yonekura S, Matsuoka R, Yamashita Y, Shimizu H, Tanaka M, Iwabuki F,  
849 Yonekura K. 2018. Hexameric and pentameric complexes of the ExbBD energizer in  
850 the Ton system. *Elife* 7.



- 851 16. Celia H, Botos I, Ni X, Fox T, De Val N, Lloubes R, Jiang J, Buchanan SK. 2019.  
852 Cryo-EM structure of the bacterial Ton motor subcomplex ExbB–ExbD provides  
853 information on structure and stoichiometry. *Communications Biology* 2:358.
- 854 17. Deme JC, Johnson S, Vickery O, Muellbauer A, Monkhouse H, Griffiths T, James  
855 RH, Berks BC, Coulton JW, Stansfeld PJ, Lea SM. 2020. Structures of the stator  
856 complex that drives rotation of the bacterial flagellum. *Nat Microbiol* 5:1553-1564.
- 857 18. Santiveri M, Roa-Eguiara A, Kuhne C, Wadhwa N, Hu H, Berg HC, Erhardt M,  
858 Taylor NMI. 2020. Structure and Function of Stator Units of the Bacterial Flagellar  
859 Motor. *Cell* 183:244-257 e16.
- 860 19. Altschul SF, Gish W, Miller W, Myers EW, Lipman DJ. 1990. Basic local alignment  
861 search tool. *J Mol Biol* 215:403-10.
- 862 20. Ihsan MZ, Ahmad SJ, Shah ZH, Rehman HM, Aslam Z, Ahuja I, Bones AM, Ahmad  
863 JN. 2017. Gene Mining for Proline Based Signaling Proteins in Cell Wall of  
864 *Arabidopsis thaliana*. *Front Plant Sci* 8:233.
- 865 21. Mishra AK, Choi J, Moon E, Baek KH. 2018. Tryptophan-Rich and Proline-Rich  
866 Antimicrobial Peptides. *Molecules* 23.
- 867 22. Ball LJ, Kühne R, Schneider-Mergener J, Oschkinat H. 2005. Recognition of proline-  
868 rich motifs by protein-protein-interaction domains. *Angew Chem Int Ed Engl*  
869 44:2852-69.
- 870 23. Marchler-Bauer A, Anderson JB, DeWeese-Scott C, Fedorova ND, Geer LY, He S,  
871 Hurwitz DI, Jackson JD, Jacobs AR, Lanczycki CJ, Liebert CA, Liu C, Madej T,  
872 Marchler GH, Mazumder R, Nikolskaya AN, Panchenko AR, Rao BS, Shoemaker  
873 BA, Simonyan V, Song JS, Thiessen PA, Vasudevan S, Wang Y, Yamashita RA, Yin  
874 JJ, Bryant SH. 2003. CDD: a curated Entrez database of conserved domain  
875 alignments. *Nucleic Acids Res* 31:383-7.
- 876 24. Biville F, Cwerman H, Letoffe S, Rossi MS, Drouet V, Ghigo JM, Wandersman C.  
877 2004. Haemophore-mediated signalling in *Serratia marcescens*: a new mode of  
878 regulation for an extra cytoplasmic function (ECF) sigma factor involved in haem  
879 acquisition. *Mol Microbiol* 53:1267-77.
- 880 25. Letoffe S, Delepelaire P, Wandersman C. 2004. Free and hemophore-bound heme  
881 acquisitions through the outer membrane receptor HasR have different requirements  
882 for the TonB-ExbB-ExbD complex. *J Bacteriol* 186:4067-74.
- 883 26. Aluyi HS, Boote V, Drucker DB, Wilson JM, Ling YH. 1992. Analysis of polar lipids  
884 from some representative enterobacteria, *Plesiomonas* and *Acinetobacter* by fast atom  
885 bombardment-mass spectrometry. *J Appl Bacteriol* 73:426-32.
- 886 27. Erdős G, Dosztányi Z. 2020. Analyzing Protein Disorder with IUPred2A. *Curr Protoc*  
887 *Bioinformatics* 70:e99.
- 888 28. de Amorim GC, Prochnicka-Chalufour A, Delepelaire P, Lefevre J, Simenel C,  
889 Wandersman C, Delepierre M, Izadi-Pruneyre N. 2013. The structure of HasB reveals  
890 a new class of TonB protein fold. *PLoS One* 8:e58964.
- 891 29. Li H, Robertson AD, Jensen JH. 2005. Very fast empirical prediction and  
892 rationalization of protein pKa values. *Proteins* 61:704-21.
- 893 30. Langsetmo K, Fuchs JA, Woodward C. 1991. The conserved, buried aspartic acid in  
894 oxidized *Escherichia coli* thioredoxin has a pKa of 7.5. Its titration produces a related  
895 shift in global stability. *Biochemistry* 30:7603-9.

- 896 31. Berka K, Hanák O, Sehnal D, Banás P, Navrátilová V, Jaiswal D, Ionescu CM,  
897 Svobodová Vareková R, Koca J, Otyepka M. 2012. MOLEonline 2.0: interactive web-  
898 based analysis of biomacromolecular channels. *Nucleic Acids Res* 40:W222-7.
- 899 32. Higgs PI, Larsen RA, Postle K. 2002. Quantification of known components of the  
900 *Escherichia coli* TonB energy transduction system: TonB, ExbB, ExbD and FepA.  
901 *Mol Microbiol* 44:271-81.
- 902 33. Ollis AA, Manning M, Held KG, Postle K. 2009. Cytoplasmic membrane  
903 protonmotive force energizes periplasmic interactions between ExbD and TonB. *Mol*  
904 *Microbiol* 73:466-81.
- 905 34. Garcia-Herrero A, Peacock RS, Howard SP, Vogel HJ. 2007. The solution structure of  
906 the periplasmic domain of the TonB system ExbD protein reveals an unexpected  
907 structural homology with siderophore-binding proteins. *Mol Microbiol* 66:872-89.
- 908 35. Ollis AA, Postle K. 2011. The same periplasmic ExbD residues mediate in vivo  
909 interactions between ExbD homodimers and ExbD-TonB heterodimers. *J Bacteriol*  
910 193:6852-63.
- 911 36. Klebba PE. 2016. ROSET Model of TonB Action in Gram-Negative Bacterial Iron  
912 Acquisition. *J Bacteriol* 198:1013-21.
- 913 37. Boags AT, Samsudin F, Khalid S. 2019. Binding from Both Sides: TolR and Full-  
914 Length OmpA Bind and Maintain the Local Structure of the *E. coli* Cell Wall.  
915 *Structure* 27:713-724 e2.
- 916 38. Hickman SJ, Cooper REM, Bellucci L, Paci E, Brockwell DJ. 2017. Gating of TonB-  
917 dependent transporters by substrate-specific forced remodelling. *Nat Commun*  
918 8:14804.
- 919 39. Larsen RA, Thomas MG, Wood GE, Postle K. 1994. Partial suppression of an  
920 *Escherichia coli* TonB transmembrane domain mutation ( $\Delta$ V17) by a missense  
921 mutation in ExbB. *Mol Microbiol* 13:627-40.
- 922 40. Ollis AA, Kumar A, Postle K. 2012. The ExbD periplasmic domain contains distinct  
923 functional regions for two stages in TonB energization. *J Bacteriol* 194:3069-77.
- 924 41. Kohler SD, Weber A, Howard SP, Welte W, Drescher M. 2010. The proline-rich  
925 domain of TonB possesses an extended polyproline II-like conformation of sufficient  
926 length to span the periplasm of Gram-negative bacteria. *Protein Sci* 19:625-30.
- 927 42. Létoffé S, Ghigo JM, Wandersman C. 1993. Identification of two components of the  
928 *Serratia marcescens* metalloprotease transporter: protease SM secretion in *Escherichia*  
929 *coli* is TolC dependent. *J Bacteriol* 175:7321-8.
- 930 43. Guzman LM, Belin D, Carson MJ, Beckwith J. 1995. Tight regulation, modulation,  
931 and high-level expression by vectors containing the arabinose PBAD promoter. *J*  
932 *Bacteriol* 177:4121-30.
- 933 44. Zheng SQ, Palovcak E, Armache JP, Verba KA, Cheng Y, Agard DA. 2017.  
934 MotionCor2: anisotropic correction of beam-induced motion for improved cryo-  
935 electron microscopy. *Nat Methods* 14:331-332.
- 936 45. Zhang K. 2016. Gctf: Real-time CTF determination and correction. *J Struct Biol*  
937 193:1-12.
- 938 46. Gomez-Blanco J, de la Rosa-Trevin JM, Marabini R, Del Cano L, Jimenez A,  
939 Martinez M, Melero R, Majtner T, Maluenda D, Mota J, Rancel Y, Ramirez-Aportela  
940 E, Vilas JL, Carroni M, Fleischmann S, Lindahl E, Ashton AW, Basham M, Clare  
941 DK, Savage K, Siebert CA, Sharov GG, Sorzano COS, Conesa P, Carazo JM. 2018.

- 942 Using Scipion for stream image processing at Cryo-EM facilities. *J Struct Biol*  
943 204:457-463.
- 944 47. Zivanov J, Nakane T, Forsberg BO, Kimanius D, Hagen WJ, Lindahl E, Scheres SH.  
945 2018. New tools for automated high-resolution cryo-EM structure determination in  
946 RELION-3. *Elife* 7.
- 947 48. Afonine PV, Poon BK, Read RJ, Sobolev OV, Terwilliger TC, Urzhumtsev A, Adams  
948 PD. 2018. Real-space refinement in PHENIX for cryo-EM and crystallography. *Acta*  
949 *Crystallogr D Struct Biol* 74:531-544.
- 950 49. Emsley P, Lohkamp B, Scott WG, Cowtan K. 2010. Features and development of  
951 Coot. *Acta Crystallogr D Biol Crystallogr* 66:486-501.
- 952 50. Moriarty NW, Grosse-Kunstleve RW, Adams PD. 2009. electronic Ligand Builder  
953 and Optimization Workbench (eLBOW): a tool for ligand coordinate and restraint  
954 generation. *Acta Crystallogr D Biol Crystallogr* 65:1074-80.
- 955 51. Punjani A, Rubinstein JL, Fleet DJ, Brubaker MA. 2017. cryoSPARC: algorithms for  
956 rapid unsupervised cryo-EM structure determination. *Nat Methods* 14:290-296.
- 957 52. Rohou A, Grigorieff N. 2015. CTFIND4: Fast and accurate defocus estimation from  
958 electron micrographs. *J Struct Biol* 192:216-21.
- 959 53. Pettersen EF, Goddard TD, Huang CC, Couch GS, Greenblatt DM, Meng EC, Ferrin  
960 TE. 2004. UCSF Chimera--a visualization system for exploratory research and  
961 analysis. *J Comput Chem* 25:1605-12.
- 962 54. Lefevre J, Delepelaire P, Delepierre M, Izadi-Pruneyre N. 2008. Modulation by  
963 substrates of the interaction between the HasR outer membrane receptor and its  
964 specific TonB-like protein, HasB. *J Mol Biol* 378:840-51.
- 965 55. Delaglio F, Grzesiek S, Vuister GW, Zhu G, Pfeifer J, Bax A. 1995. NMRPipe: a  
966 multidimensional spectral processing system based on UNIX pipes. *J Biomol NMR*  
967 6:277-93.
- 968 56. Vranken WF, Boucher W, Stevens TJ, Fogh RH, Pajon A, Llinas M, Ulrich EL,  
969 Markley JL, Ionides J, Laue ED. 2005. The CCPN data model for NMR spectroscopy:  
970 development of a software pipeline. *Proteins* 59:687-96.
- 971 57. Wishart DS, Bigam CG, Yao J, Abildgaard F, Dyson HJ, Oldfield E, Markley JL,  
972 Sykes BD. 1995. <sup>1</sup>H, <sup>13</sup>C and <sup>15</sup>N chemical shift referencing in biomolecular NMR. *J*  
973 *Biomol NMR* 6:135-40.
- 974 58. Lefèvre J, Simenel C, Delepelaire P, Delepierre M, Izadi-Pruneyre N. 2007. (<sup>1</sup>H,  
975 (<sup>13</sup>C and (<sup>15</sup>N resonance assignments of the C-terminal domain of HasB, a specific  
976 TonB like protein, from *Serratia marcescens*. *Biomol NMR Assign* 1:197-9.
- 977  
978

979 **Tables**

|                                   |                                    |                                    |
|-----------------------------------|------------------------------------|------------------------------------|
| Afiopia broomeae                  | Hartmannibacter diazotrophicus     | Phreatobacter stygius              |
| Agrobacterium rhizogenes          | Hoeflea olei                       | Phyllobacterium zundukense         |
| Aliihoeflea sp.                   | Hyphomicrobium nitrativorans       | <b>Proteobacteria bacterium</b>    |
| Aminobacter aminovorans           | Insolitispirillum peregrinum       | Pseudaminobacter manganicus        |
| Amorphus coralli                  | <b>Kaistia granuli</b>             | Pseudochrobactrum asaccharolyticum |
| Ancylobacter aquaticus            | Ketogulonicigenium robustum        | Pseudolabrys taiwanensis           |
| Aquamicrobium aerolatum           | Labrys okinawensis                 | Pseudorhizobium pelagicum          |
| Aurantimonas manganoxydans        | Magnetospirillum gryphiswaldense   | Pseudorhodoplanes sinuspersici     |
| Aureimonas flava                  | <b>Mangrovicella endophytica</b>   | Reyranelia massiliensis            |
| Azorhizobium caulinodans          | Mesorhizobium loti                 | Rhizobium tropici                  |
| Azospirillum brasilense           | <b>Methylobrevis pamukkalensis</b> | Rhodoligotrophos sp.               |
| bacterium A52C2                   | Methylocapsa acidiphila            | Rhodomicrobium udaipurensis        |
| Bartonella apis                   | Methyloceanibacter stevinii        | Rhodopseudomonas pseudopalustris   |
| <b>Beijerinckiaceae bacterium</b> | Methylocella silvestris            | Rhodospirillum centenum            |
| Blastochloris sp.                 | Methylogigella halotolerans        | Rhodovarius sp.                    |
| Bosea vaviloviae                  | Methylopila sp.                    | Roseococcus sp.                    |
| Bradyrhizobium yuanmingense       | Methylovirgula ligni               | Roseospirillum parvum              |
| Brucella sp.                      | Microvirga aerophila               | Sinirhodobacter sp.                |
| Chelatococcus asaccharovorans     | Neorhizobium alkalisoli            | Sinorhizobium sp.                  |
| Ciceribacter lividus              | Nitratireductor pacificus          | Skermanella aerolata               |
| Devosia psychrophila              | Nitrobacter hamburgensis           | Sphingobium chlorophenicum         |
| Dongia mobilis                    | Nitrospirillum amazonense          | Sphingomonas sp.                   |
| Enterovirga rhinocerotis          | Niveispirillum cyanobacteriorum    | Sphingopyxis sp.                   |
| Erythrobacter                     | Ochrobactrum thiophenivorans       | Sphingorhabdus sp.                 |
| Falsochrobactrum ovis             | Paenirhodobacter enshiensis        | Starkeya novella                   |
| Geminicoccus roseus               | <b>Paracoccus aminovorans</b>      | Tardiphaga robiniae                |
| Granulibacter thesedensis         | Paramesorhizobium deserti          | Telmatospirillum siberiense        |
| Haematobacter massiliensis        | Parvibaculum lavamentivorans       | Variibacter gotjawalensis          |
| <b>Hanschlegelia zhihuaiae</b>    | Phaeospirillum fulvum              | Xanthobacter autotrophicus         |

980

981

982 Table I: a list of selected species of Alphaproteobacteria where “extralong” ExbB’s are found.

983 All those species also contain HasB orthologs, except for the ones in red.

984

| <b>Complex</b>                                      | <b>ExbB</b>                         | <b>ExbB-ExbD</b>           |
|-----------------------------------------------------|-------------------------------------|----------------------------|
| Deposition ID                                       | EMD-10789, PDB 6YE4                 | EMD-11806, PDB ID 7AJQ     |
| Data collection and processing                      |                                     |                            |
| Microscope type, camera                             | ESRF Titan Krios, Gatan K2          | ESRF Titan Krios, Gatan K2 |
| Magnification                                       | 165000                              | 139000                     |
| Voltage (kV)                                        | 300                                 | 300                        |
| Electron exposure (e <sup>-</sup> /Å <sup>2</sup> ) | 56                                  | 55                         |
| Defocus range (μm)                                  | -1.5 to -2.5                        | -1 to -3                   |
| Pixel size (Å)                                      | 0.87                                | 1.067                      |
| Initial particle images (no.)                       | 850000                              | 1373000                    |
| Final particle images (no.)                         | 157000                              | 158000                     |
| Map resolution (Å)                                  | 3.1                                 | 3.96                       |
| FSC threshold                                       | 0.143                               | 0.143                      |
| Map resolution range (Å)                            | 3.1-5.5                             | 3.96-8                     |
| Symmetry imposed                                    | C5                                  | C1                         |
| Initial model used                                  | Phyre2 homology model based on 5SV0 | Our ExbB structure         |
| Model composition                                   |                                     |                            |
| Non-hydrogen atoms                                  | 9145                                | 9256                       |
| Protein residues                                    | 1180                                | 1229                       |
| Ligands                                             | PGT : 5                             | 0                          |
| B factors (Å <sup>2</sup> )                         |                                     |                            |
| Protein min/max/mean                                | 21.58/ 145.06/ 45.97                | 93.07/ 411.58/ 169.35      |
| Ligand min/max/mean                                 | 45.43/ 46.91/ 46.12                 |                            |
| R.m.s. deviations                                   |                                     |                            |
| Bond length (Å) (# >4σ)                             | 0.026 (3)                           | 0.003 (0)                  |
| Bond angles (°) (# > 4σ)                            | 1.56 (8)                            | 0.573 (4)                  |
| Validation                                          |                                     |                            |
| Refined model CC                                    | 0.85                                | 0.77                       |
| MolProbity score                                    | 1.1                                 | 2.03                       |
| Clashscore                                          | 3                                   | 15.3                       |
| Poor rotamers (%)                                   | 0                                   | 0                          |
| Ramachandran plot                                   |                                     |                            |
| Favored (%)                                         | 99                                  | 95                         |
| Allowed (%)                                         | 1                                   | 5                          |
| Disallowed (%)                                      | 0                                   | 0                          |

985

986

987

988

Table II: Data collection, processing, and refinement statistics for ExbB<sub>Sm</sub> and ExbBD<sub>Sm</sub>.

|      |                                                                                              |
|------|----------------------------------------------------------------------------------------------|
| 989  | Strains :                                                                                    |
| 990  | <i>E. coli</i> K12 C600                                                                      |
| 991  | <i>E. coli</i> K12 C600 $\Delta$ <i>hemA::Km'</i> $\Delta$ <i>exbBD</i>                      |
| 992  | <i>E. coli</i> K12 C600 $\Delta$ <i>hemA::Km'</i> $\Delta$ <i>exbBD</i> $\Delta$ <i>tonB</i> |
| 993  | <i>E. coli</i> K12 XL1-Blue                                                                  |
| 994  | <i>E. coli</i> K12 JP313                                                                     |
| 995  | <i>E. coli</i> K12 JP313 $\Delta$ <i>exbBD</i> $\Delta$ <i>tonB</i>                          |
| 996  | <i>E. coli</i> K12 C600 $\Delta$ <i>exbBD</i>                                                |
| 997  | <i>E. coli</i> BL21DE3                                                                       |
| 998  | <i>S. marcescens</i> Db11                                                                    |
| 999  |                                                                                              |
| 1000 | Plasmids :                                                                                   |
| 1001 | pBAD24: lab collection                                                                       |
| 1002 | pBAD33: lab collection                                                                       |
| 1003 | pAM238: lab collection                                                                       |
| 1004 | pAMHasISRADE: lab collection                                                                 |
| 1005 | pAMHasISRADEB: this work                                                                     |
| 1006 | pBADE <b>ExbBD</b> <sub>Ec</sub> : this work                                                 |
| 1007 | pBADE <b>ExbBD</b> <sub>Sm</sub> : this work                                                 |
| 1008 | pBADE <b>ExbBD</b> <sub>Ec-Sm76-88</sub> : this work                                         |
| 1009 | pBADE <b>ExbBD</b> <sub>Ec-Sm76-84</sub> : this work                                         |
| 1010 | pBADE <b>ExbBD</b> <sub>Sm-Ec39-51</sub> : this work                                         |
| 1011 | pBADE <b>ExbBD</b> <sub>delextss</sub> : this work                                           |
| 1012 | pBADHasB: lab collection                                                                     |
| 1013 | pBADE <b>ExbBD</b> <sub>SmHis6</sub> : this work                                             |
| 1014 | pBADE <b>ExbB</b> <sub>SmHis6</sub> : this work                                              |
| 1015 | pBADE <b>ExbB</b> <sub>SmdelextssHis6</sub> : this work                                      |
| 1016 |                                                                                              |
| 1017 | Oligonucleotides:                                                                            |
| 1018 | <b>ExbBDSm5'</b> 5'-GGAGGAATTCACCATGAAAACGGCTGGCAAGAAT -3'                                   |
| 1019 | <b>ExbBDSm3'</b> 5'-AAGCTTGCATGCCTATTTGGCGGCCTTCCA-3'                                        |
| 1020 | <b>SphIHisC<b>ExbBDSm</b></b> 5'-TTGCATGCCTAATGGTGATGGTGATGGTGTTTTGGCGCGCCTTC-3'             |
| 1021 | <b>BglII<b>ExbBDSm</b></b> 5'-GCGCTTAAATGAAGATCTGGACGACAGCGG-3'                              |
| 1022 | <b>ExbBD5c</b> 5'-CAGGAGGAATTCACCATGGGTAATAATTTAATGCAGACGGA-3'                               |
| 1023 | <b>ExbBD3c</b> 5'-AAGCTTGCATGCTTACTTCGCTTTGGCGGTTTCTT-3'                                     |
| 1024 | <b>PBADFOR</b> 5'-CTGACGCTTTTTATCGCAAC-3'                                                    |
| 1025 | <b>ExbBHis6</b> 5'-                                                                          |
| 1026 | AAGCTTGCATGCCTAATGGTGATGGTGATGGTGCCCCGCCCCGCAGTTG-3'                                         |
| 1027 | <b>ExbBEcSm76-88.1</b> 5'-P-GGCAGTGAAGTCTGCGCGCCAAGCGTCGCCTTAAGCGCGAG-3'                     |
| 1028 | <b>ExbBEcSm76-88.2</b> 5'-P-TTTAGCGAACAAAATGGTCCAGGTGACTACGGAGGCCAAAAT-3'                    |
| 1029 | <b>ExbBEcSm76-84.1</b> 5'-P-CTAAAGGCAGTGAATTCTTCAATCAGAAGCGTCG-3'                            |
| 1030 | <b>ExbBEcSm76-84.2</b> 5'-P-CGAACAAAATGGTCCAGGTGACTACGGAGGCCA-3'                             |
| 1031 | <b>ExbBSmEc39-51.1</b> 5'-P-GCGTAGAGTTCTTCAATCAGAAGCGCCGTCTGCGTCGCGA-3'                      |
| 1032 | <b>ExbBSmEc39-51.2</b> 5'-P-TCTTACTGAAGAAGATTGCCAGGTACACGATAGACGCCAG-3'                      |
| 1033 | <b>ExbBdelextss1</b> 5'-P- GAAACCCGCGGCATGGACCTGTCCATTTGGGG-3'                               |
| 1034 | <b>ExbBdelextss2</b> 5'-P- TGCCTGCGCGCTGCCGGCCAGCCCCACAA-3'                                  |
| 1035 |                                                                                              |
| 1036 | Table III: list of strains, plasmids and oligonucleotide sequences used in this work         |
| 1037 |                                                                                              |



1038 **Figure Legends**

1039  
1040 Figure 1: ExbB sequence analysis. A: alignment of ExbB<sub>Ec</sub> (top) with ExbB<sub>Sm</sub> (bottom), made  
1041 with DNA Strider v1.4x-2b, CEA. In red is shown the signal sequence from ExbB<sub>Sm</sub>, and in  
1042 blue the periplasmic extension, not present in ExbB<sub>Ec</sub>. The consensus sequence is shown on  
1043 the middle line, where + indicates similar amino-acid residues. B: Weblogo (24)  
1044 representation of 131 « long » ExbB aminoacid sequences aligned with Clustal omega (25);  
1045 those with much shorter periplasmic extensions have been excluded from the alignment. The  
1046 orange boxes show the position of the three TM segments from the *E. coli* 5SV0 structure.

1047  
1048  
1049 Figure 2: ExbBD<sub>Sm</sub> complements ExbBD<sub>Ec</sub>. overnight growth in LB broth of *E. coli*  
1050 C600Δ*exbBD*(pBAD24) (blue), C600Δ*exbBD*(pBAD24ExbBD<sub>Ec</sub>) (orange), and  
1051 C600Δ*exbBD*(pBAD24ExbBD<sub>Sm</sub>) (grey), without (0) or with 100 and 200μM iron chelator  
1052 di-pyridyl (DiP). One representative experiment is shown. The vertical axis represents  
1053 mDO<sub>600nm</sub> absorbance units.

1054  
1055 Figure 3: Role of HasB and TonB on bacterial growth. A: representation of the constructions  
1056 used in Figure 3 B, 3C, 3D and elsewhere in this work. ss refers to the signal sequence, ext to  
1057 the periplasmic extension of ExbB<sub>Sm</sub>, and tm1, tm2 and tm3 to the first, second and third  
1058 ExbB transmembrane segments, respectively. B and C: growth around wells of *E. coli*  
1059 C600Δ*hemA*Δ*tonB*Δ*exbBD* harbouring pAMHasISRADEB and specified recombinant plasmids  
1060 (B and C left parts) or *E. coli* C600Δ*hemA*Δ*exbBD* harbouring pAMHasISRADE and specified  
1061 recombinant plasmids (B and C right parts); the pictures were taken after overnight growth at  
1062 37°C (B), or after 36hrs growth (C). Arabinose concentration was 40μg/ml. Dipyrindyl (DiP)  
1063 iron chelator concentration was either 100 or 200μM. Heme-BSA concentrations inside the  
1064 wells were 10, 2 and 0,4μM. D: growth curves in microplates of the same strains as in B/C;  
1065 DiP concentration was 100μM, arabinose concentration 4μg/ml, Heme-BSA 1μM. Colored  
1066 dots in B and C refer to the equivalent growth conditions in D.

1067  
1068  
1069 Figure 4: Homogeneity assessment of ExbB and ExbBD. Size exclusion chromatography  
1070 profiles of representative purification of respectively ExbB<sub>Sm</sub>His6 (A) and ExbBD<sub>Sm</sub>His6 (B)  
1071 on a Superose 6 10/300 column. The 280nm absorbance is plotted as a function of elution  
1072 volume. A Coomassie-stained gel of the pooled peak fractions is shown on the right of each  
1073 profile together with a molecular weight ladder on the right (respectively 15, 25, 35, 40, 55,  
1074 70, 100, 130 and 170kDa). The faint band present in the Exb B<sub>Sm</sub>His6 sample above 100kDa  
1075 was identified as AcrB using mass spectrometry.

1076  
1077 Figure 5:  
1078 Interaction of HasB<sub>CTD</sub> with the periplasmic fragment of ExbB<sub>Sm</sub>, as detected by NMR. A:  
1079 Superposed <sup>1</sup>H–<sup>15</sup>N HSQC spectra of 0.15 mM <sup>15</sup>N-labelled HasB<sub>CTD</sub> in 50mM sodium  
1080 phosphate, pH 7, 50 mM NaCl in the presence (red) or absence (black) of the periplasmic  
1081 peptide of ExbB<sub>Sm</sub> residues 1-44. B and C: HasB<sub>CTD</sub> residues (PDB code 2M2K) exhibiting the  
1082 highest CSP in the presence of the periplasmic peptide of ExbB<sub>Sm</sub> are coloured red (B: surface  
1083 representation; C: cartoon representation). The residues showing the highest CSP are indicated.

1084

1085 Figure 6: ExbB TM1 interacts with HasB. A: bacterial growth curves of *E. coli*  
1086 C600 $\Delta$ hemA $\Delta$ exbBD $\Delta$ tonB harbouring pAMHasISRADeB plasmid together with either  
1087 pBAD24 (medium-blue), pBADExbBD<sub>Sm</sub> (orange) or pBADExbBD<sub>Smdelectss</sub> (yellow),  
1088 pBADExbBD<sub>Ec</sub> (grey), pBADExbBD<sub>EcSm76-88</sub> (green), pBADExbBD<sub>EcSm76-84</sub> (dark-blue),  
1089 pBADExbBD<sub>SmEc39-51</sub> (magenta) in the presence of 1 $\mu$ M He-BSA as heme source, 4 $\mu$ g/ml  
1090 arabinose to induce ExbBD expression and 100 $\mu$ M dipyriddy to induce iron starvation (see  
1091 Materials and Methods for further details). The optical path was ca. 3mm long, and each  
1092 curve represents the mean of four replicates of the same culture, recorded every 30 minutes  
1093 for 66 hours. Bottom: Coomassie-blue stained gel (B) and immunodetection (C) with anti-  
1094 His6 antibody of membrane preparations of *E. coli* C600 harbouring either pBAD24 plasmid  
1095 (1), pBADExbB<sub>Sm</sub> (2) or pBADExbB<sub>Smdelectss</sub> (3). The equivalent of 0.6 OD<sub>600nm</sub> was loaded  
1096 in B, and of 0.3 OD<sub>600nm</sub> in C.

1097  
1098 Figure 7: Representation of the pentameric structure of ExbB<sub>Sm</sub> solved by cryo-EM. A: the  
1099 cryo-EM density map is shown, each monomer with distinct colours, view from the side. The  
1100 yellow/grey regions represent non-protein density. The yellow regions were modeled as PG  
1101 molecules. B: view from the cytoplasmic side. C: superposition of a monomer of ExbB<sub>Ec</sub>  
1102 (dark grey) and ExbB<sub>Sm</sub> (red), represented as ribbon. The membrane thickness is represented  
1103 by the dotted lines and the transmembrane segments TM1 (part of  $\alpha$ 2 helix), TM2 (part of  $\alpha$ 6  
1104 helix) and TM3 (part of  $\alpha$ 7 helix) are indicated. D: close-up representation of one PG density;  
1105 E: fitting of the PG molecule inside the density; nearby ExbB residues are depicted as sticks  
1106 using the Coot software (49).

1107  
1108 Figure 8: Structure of ExbBD<sub>Sm</sub> solved by cryo-EM. The same color code as in Figure 7 for is  
1109 used the ExbB monomers and the two ExbD monomers are colored yellow and gold. A: side  
1110 view; B: view from the periplasmic space. C: clipped side view, with the helix of each ExbD  
1111 monomer represented (yellow and gold). For B and C, the insets show the clipping planes.

1112  
1113 Figure 9: Visualisation of “tunnels” inside ExbBD structures from *S. marcescens* (A and C)  
1114 and *E. coli* 6TYI structure (B and D), as calculated by the MoleOnline server with the same  
1115 parameters. The Sm complex is colored as in Figure 8 and the Ec complex is coloured in  
1116 shades of grey for ExbB and orange and red for ExbD. The tunnels are the green volumes  
1117 running through the structure, viewed from the periplasmic space (A and B), and from the  
1118 side (C and D). The average tunnel diameter is 3Å for *S. marcescens* and 2Å for *E. coli*.

1119  
1120 Figure 10: ExbBD co-expression is necessary for HasB stabilisation. Immunodetection of  
1121 HasB in whole cells of *E. coli* JP313 $\Delta$ exbBD $\Delta$ tonB(pHasB33) also harbouring pBAD24  
1122 (control), pBAD24ExbBD<sub>Ec</sub>, pBAD24ExbBD<sub>Sm</sub> or pBAD24ExbBD<sub>Ec-Sm76-88</sub>, in the presence  
1123 of either glucose (1mg/ml) or arabinose (40 $\mu$ g/ml), indicated by the + signs. The equivalent of  
1124 0.2OD<sub>600nm</sub> was loaded in each lane.

1125  
1126 Figure 11: ExbB  $\alpha$ 2 helix: comparison between Sm and Ec. ExbB-ExbD structure with residues  
1127 76-88 coloured black and showing the aminoacid side chains. A, general view of the Sm  
1128 pentamer; B, an enlarged view of A; C and D, two perpendicular close-up views of the  
1129 exchanged region 76-88 in Sm (C) and 39-51 in Ec (D). E and F: Helical wheel representations  
1130 of the swapped regions between ExbB<sub>Sm</sub> and ExbB<sub>Ec</sub> TM1. E: ExbB<sub>Sm</sub> 76-88; F: ExbB<sub>Ec</sub> 39-  
1131 51. The red boxes show the helical face in interaction with the membrane.





**A**

```

1 -----MGNNLMQTDLSVWGMVQHADIVVKCVMIGLILASVVTWAIFFSK 44
      DLS+WGMVQHAD VVK VMIGL+LAS+VTW I F+K
1 MKTAGKNLNQGSFGQGRAQWGKAFGRSLMASMVLVVGLAGSAQAAPAANPAVTESVAPTTAPAPAAAAPESTITPVNPAPTIQPPETRGM
      20      40      60      80      100      120      140      160      180      200      220      240
45 SVEFFNQKRRLLKREQQLLAEARSLNQANDIAADFGSKSLSLHLLNEAQNELELSEGSDDNEGKERTSFRLEERRVAAVGRQMGRNGYLATIGAI
      E KRRL+REQ LAEARSL++A+++A +F +S+S LLN+AQNELELS S+DN GIKERT FRLEERRVAA R MGRGNG+LATIGAI
126 GSELLRAKRRLLRRELQALAEARSLDEASELAQNFSPESVSAVLLNDAQNELELSAESNDNNGIKERTGFRLEERRVAAYSRNMGRNGFLATIGAI
      140      160      180      200      220      240
170 VAPGIAEALLATAIGLVAAIPAVVIYNVFAEQIGGFKAMLGDVAAQVLLLQSRDLDLLEASAAAHPPVVAQKLRAG 244
      VAPGIAEALLATA+GLVAAIPAVVIYN+FAE I G +A +GDVAAQVLLLQ RDLDL A+A A + A +LRAG
251 VAPGIAEALLATAMGLVAAIPAVVIYNIFARVISGHRAQVGDVAAQVLLLQGRDLDLAATAEAKRSQHHAQLRAG 325

```

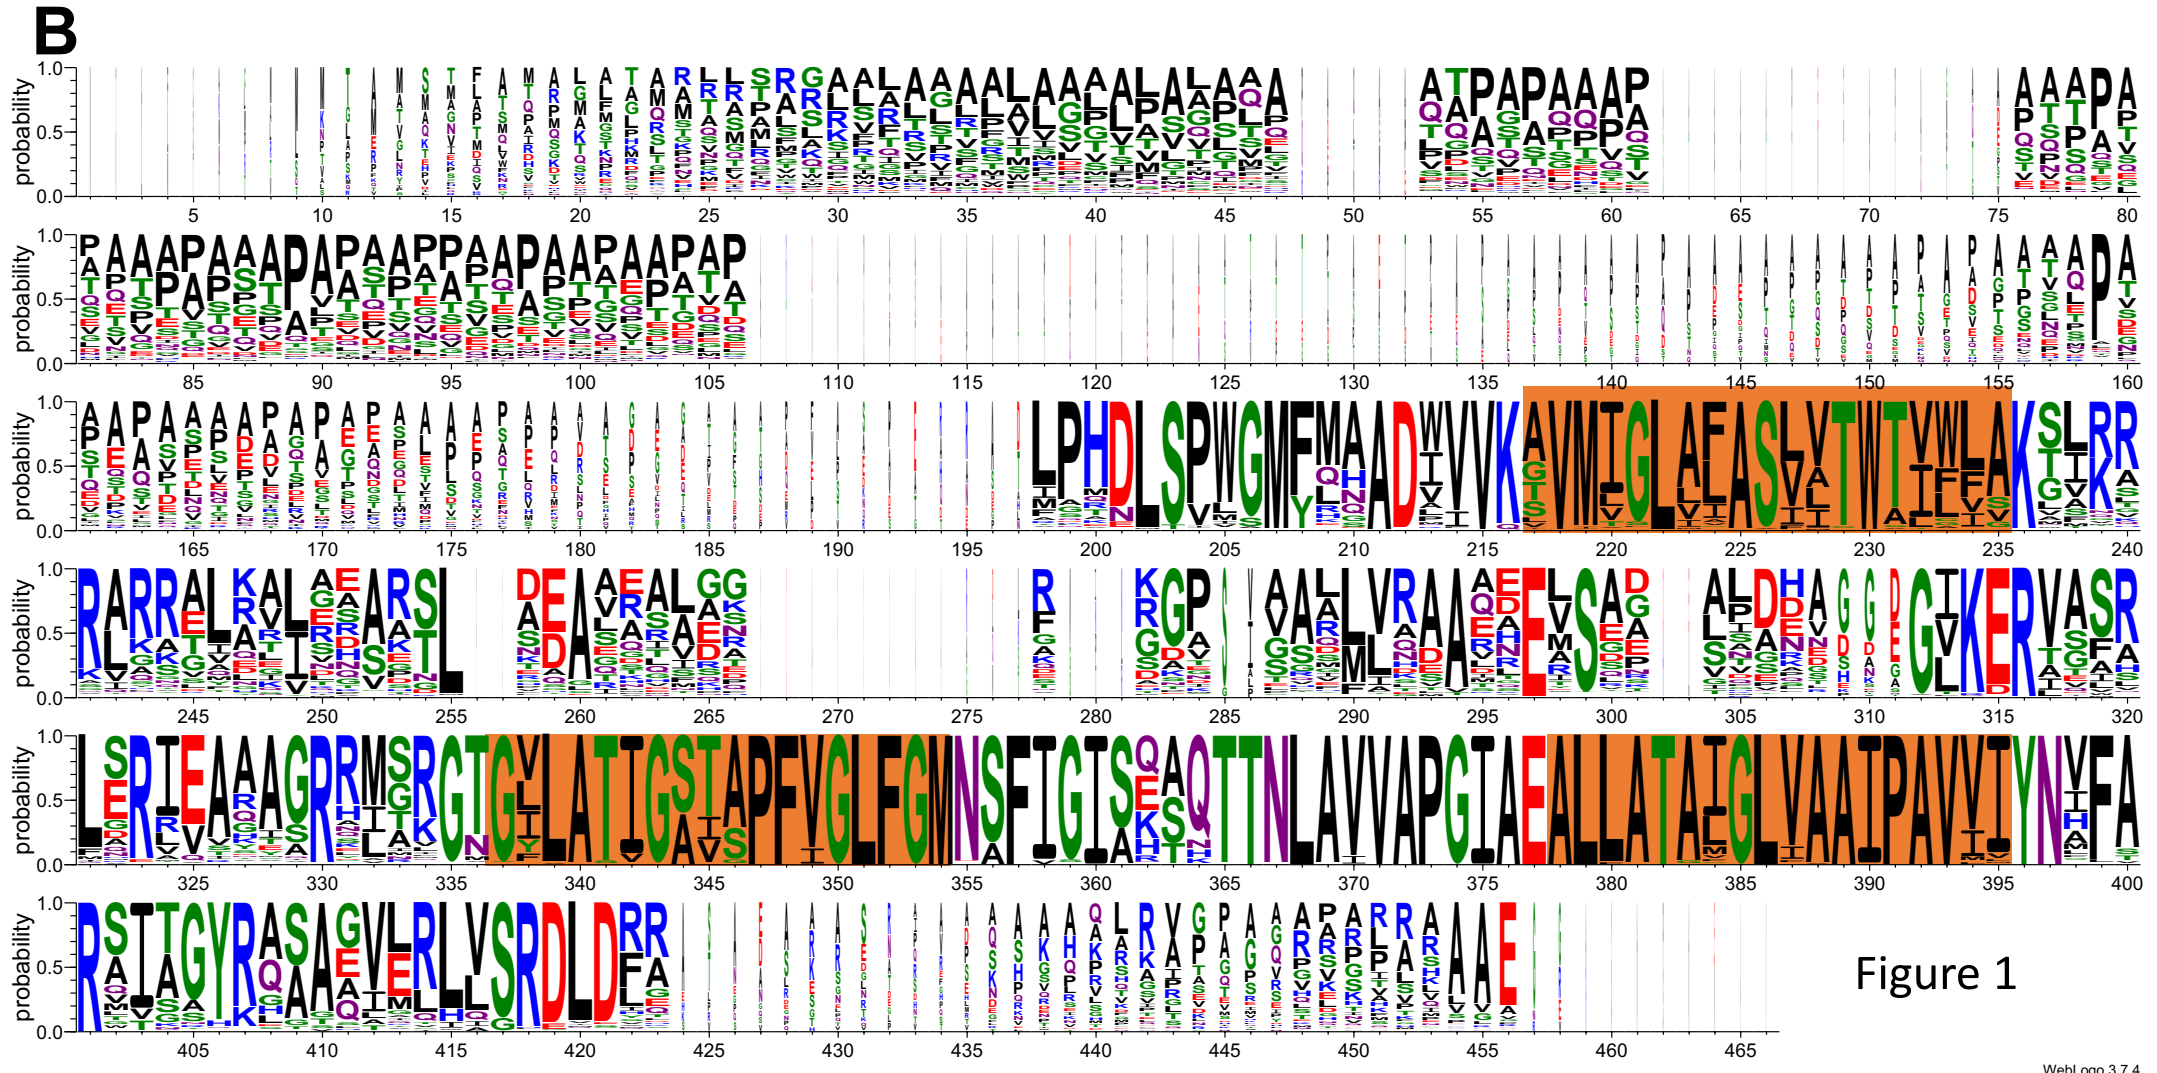

Figure 1

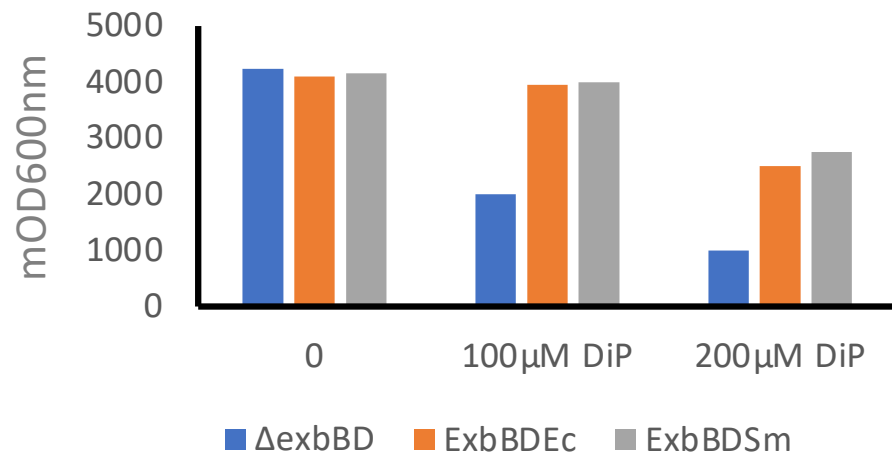

Figure 2

**A**

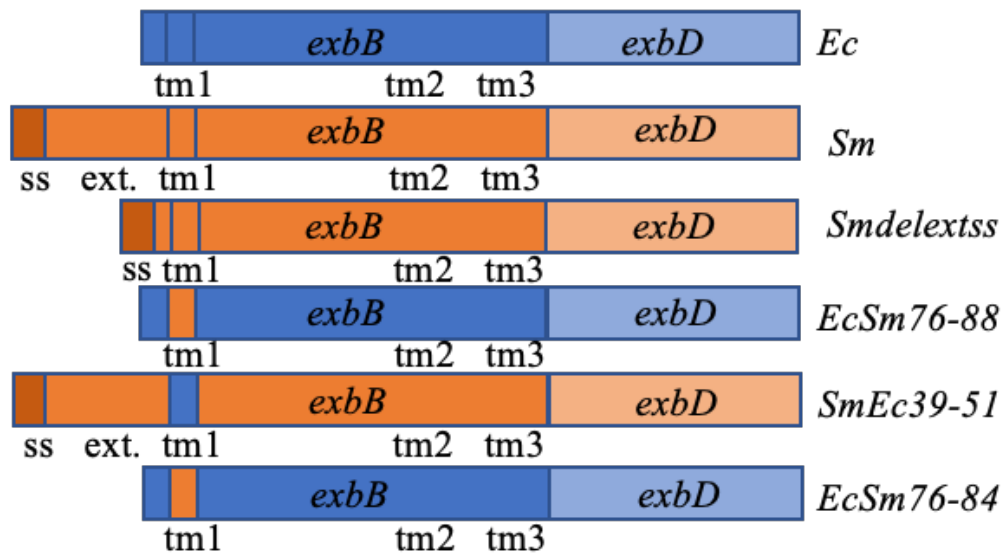

**B**

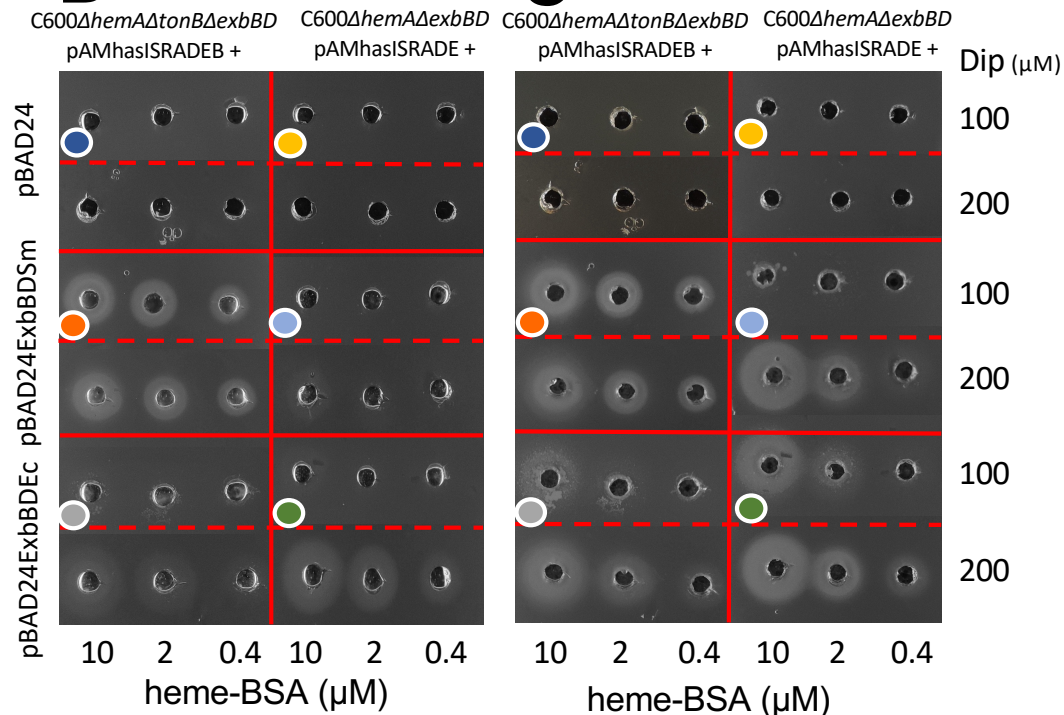

**C**



**D**

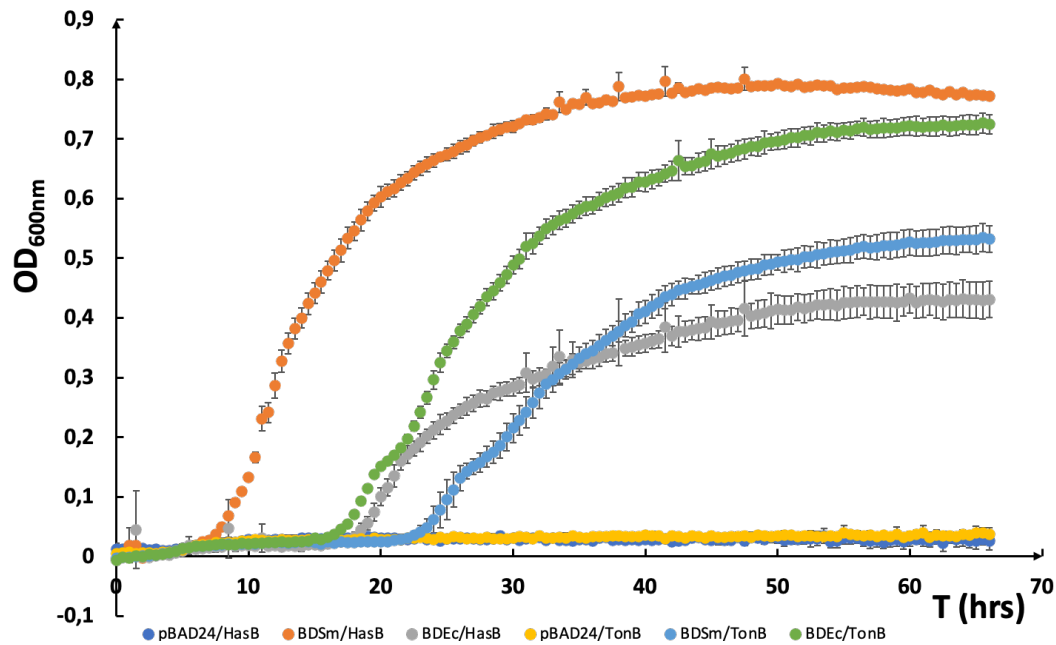

Figure 3

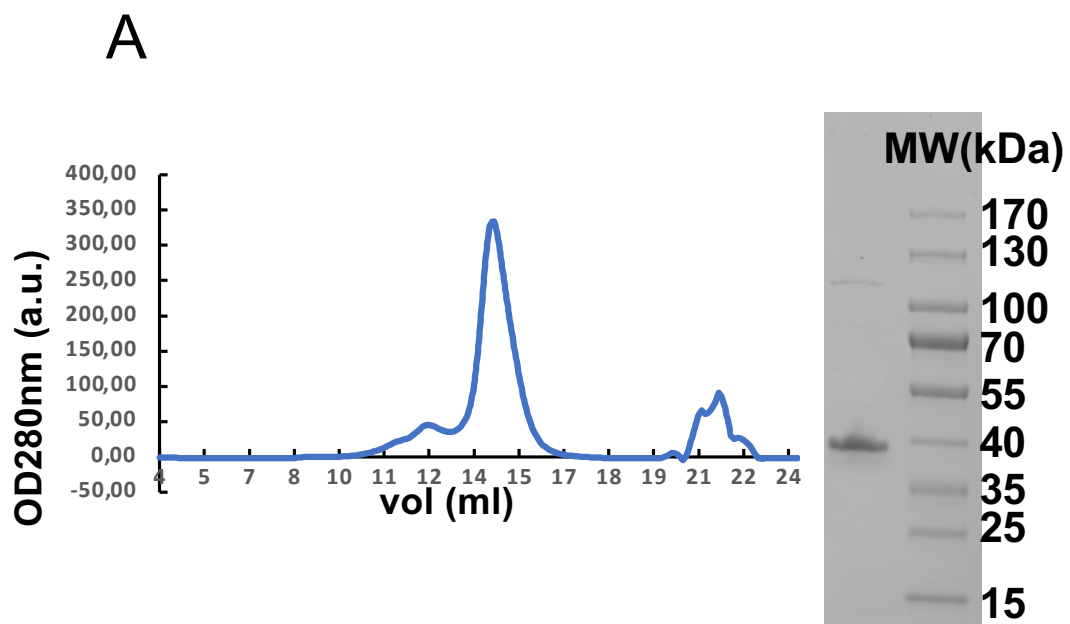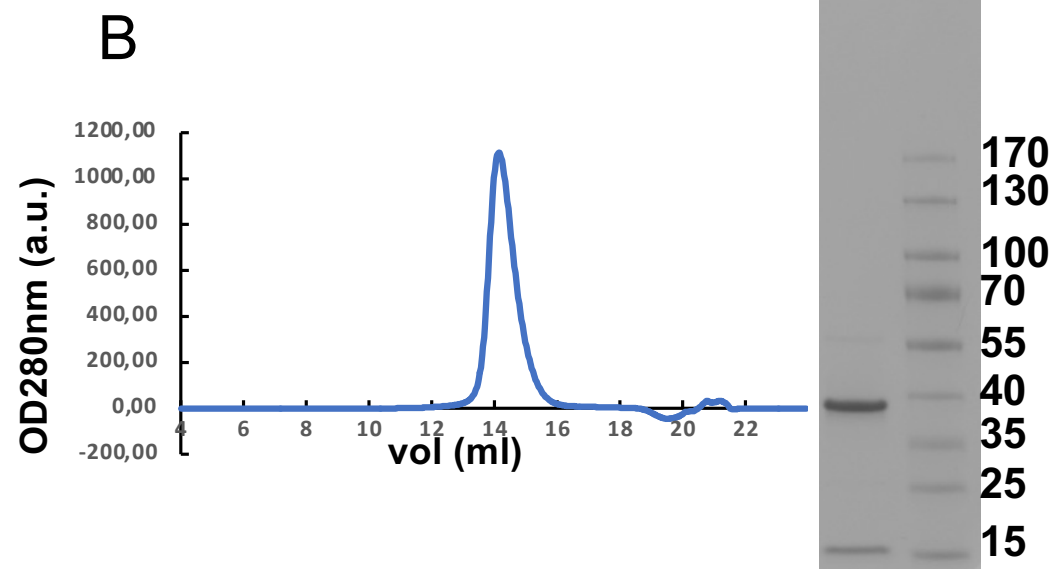

Figure 4

**A**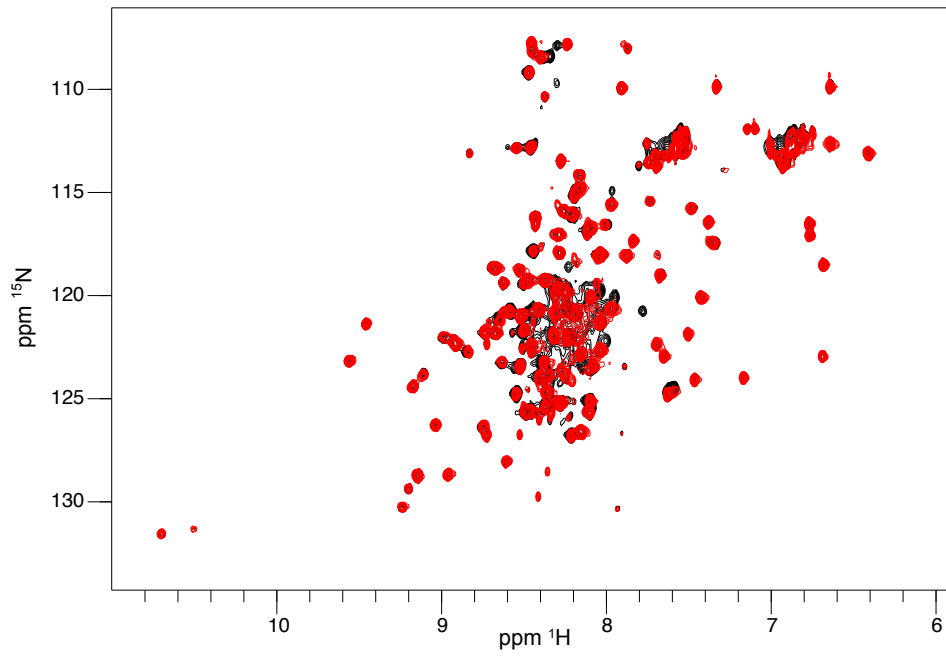**B**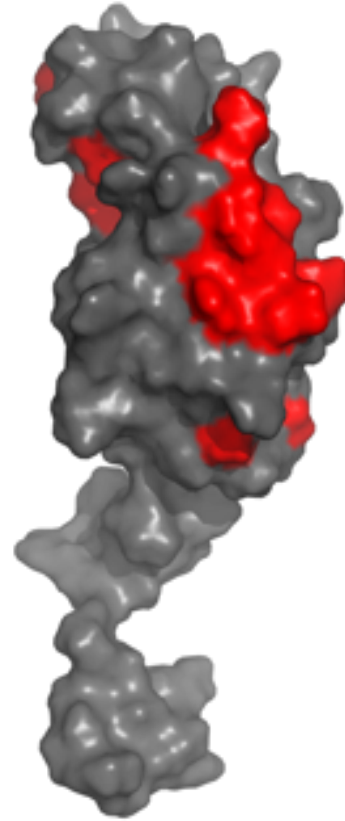**C**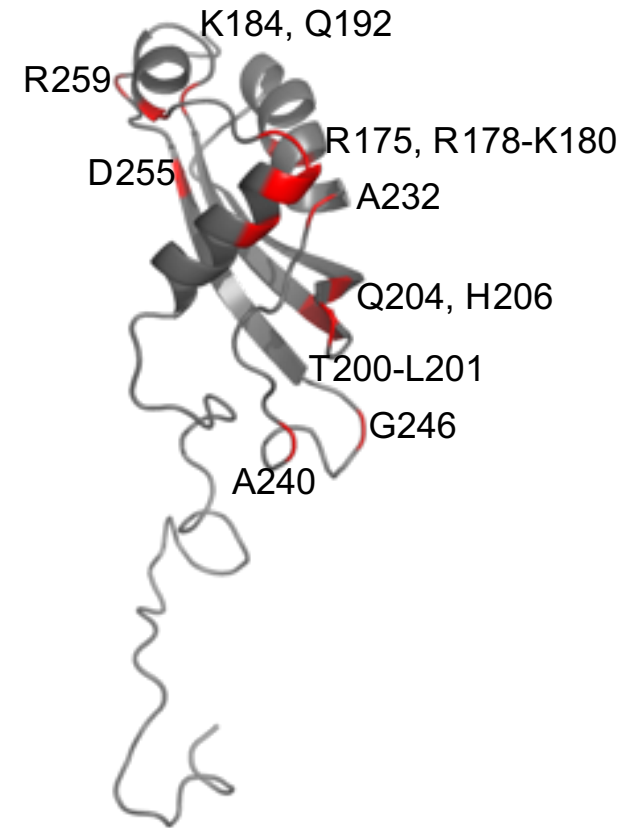

Figure 5

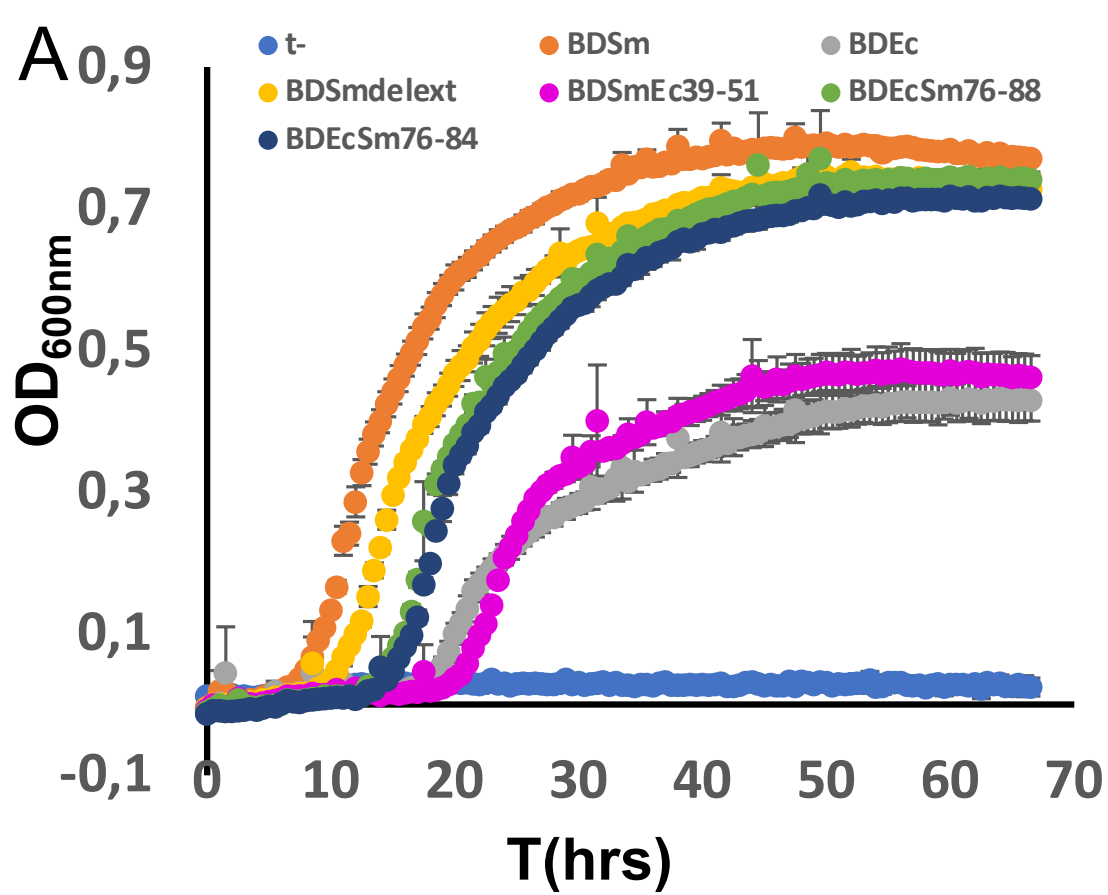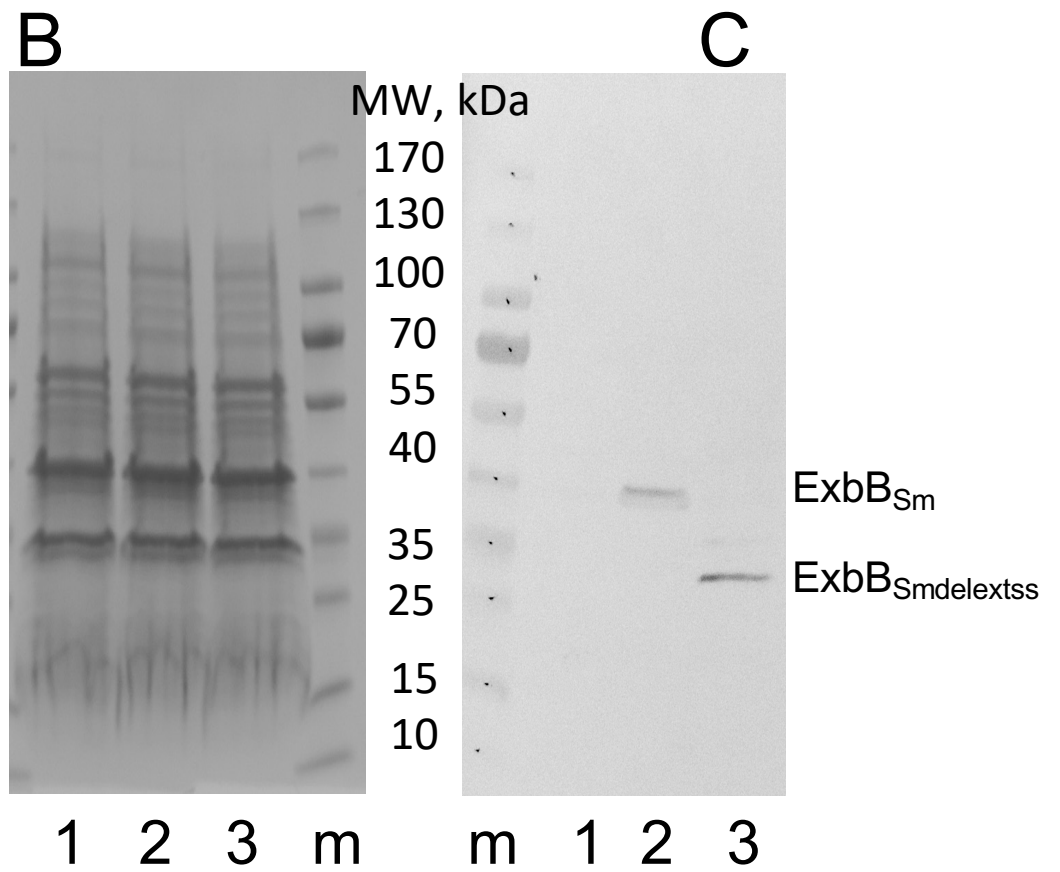

Figure 6



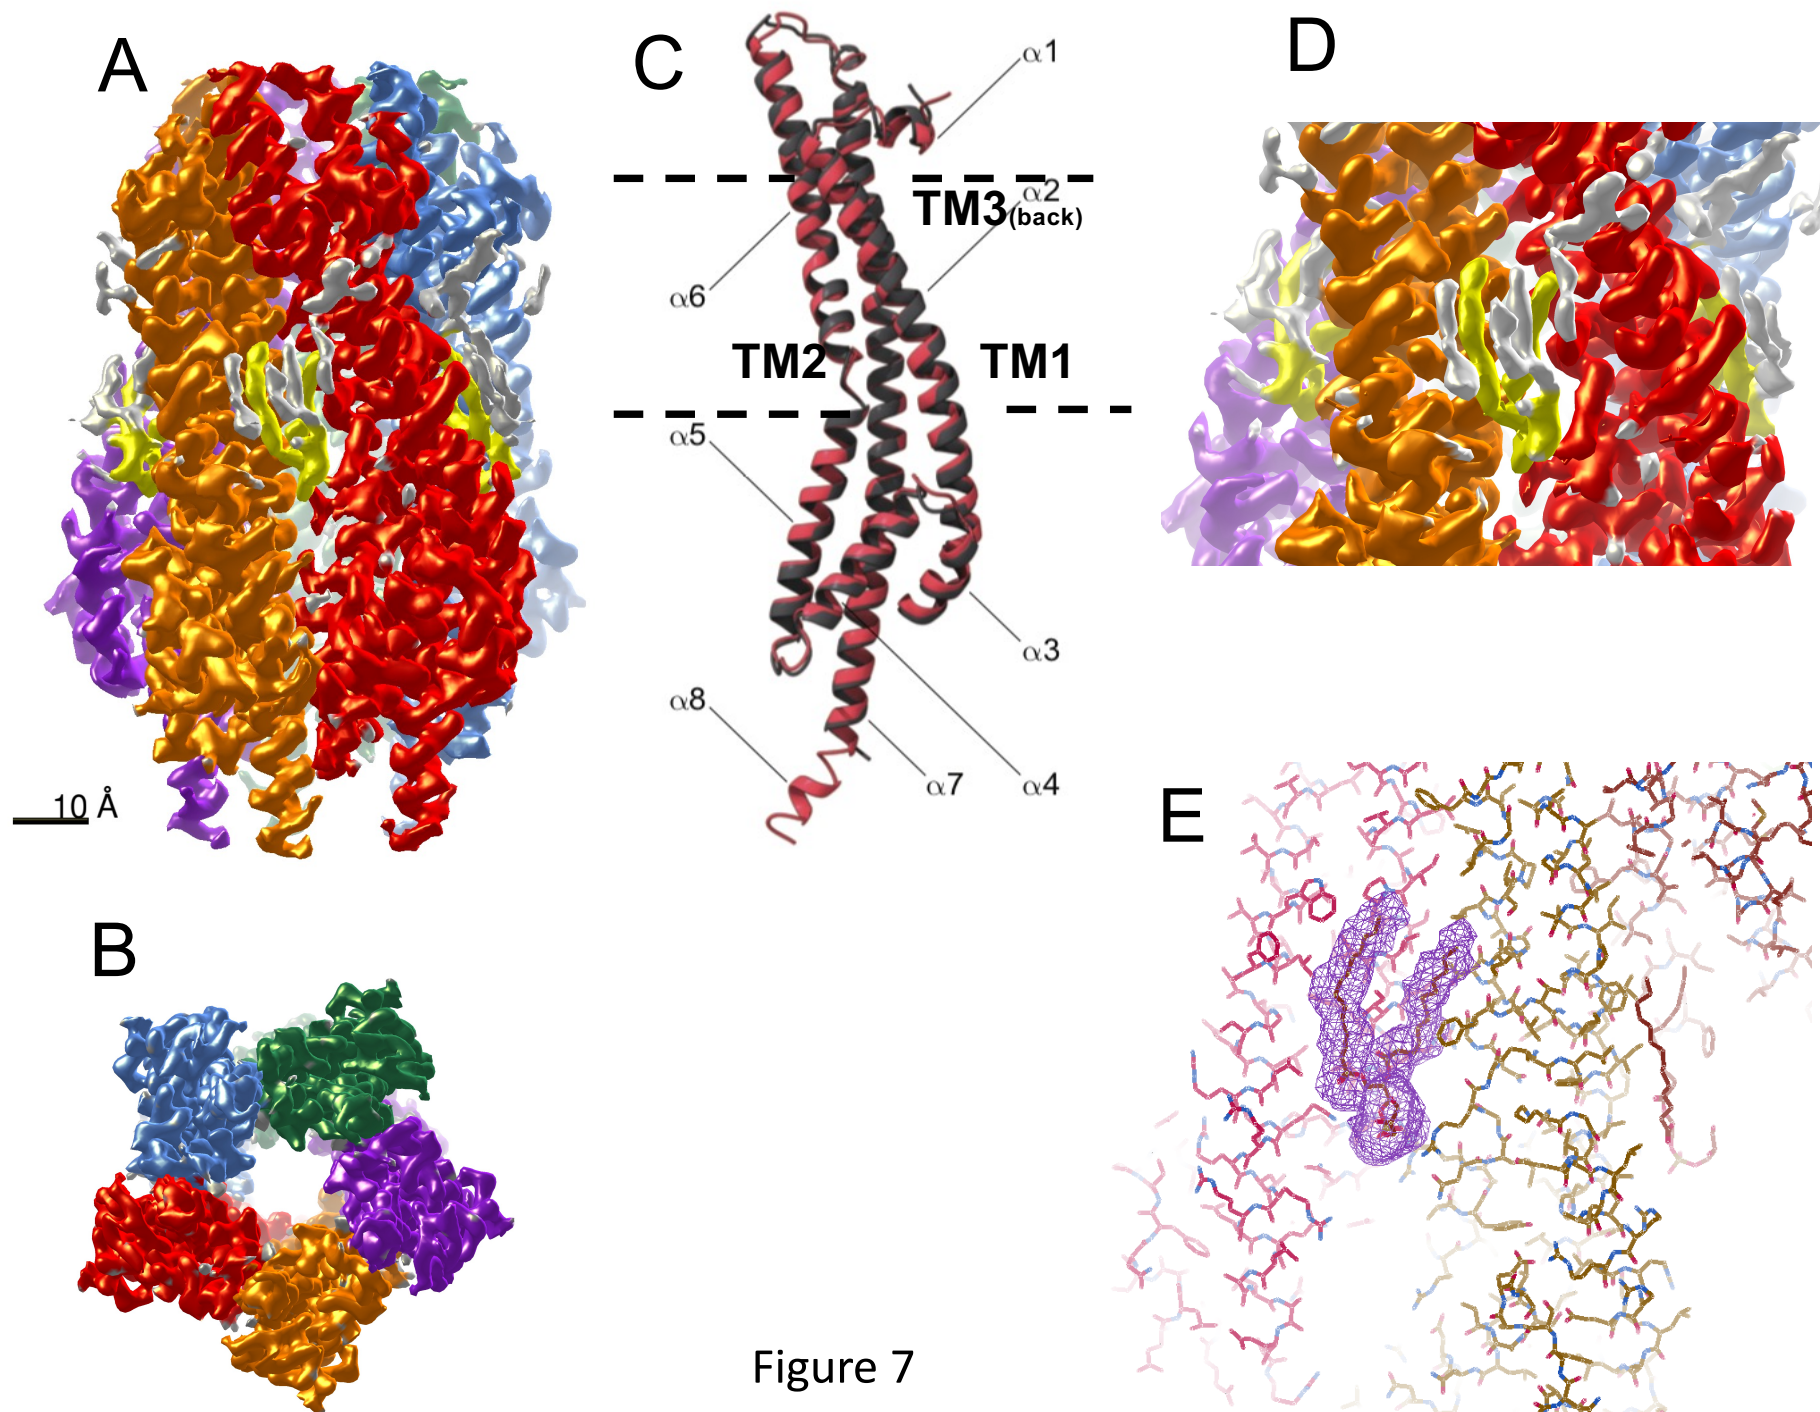

Figure 7



A

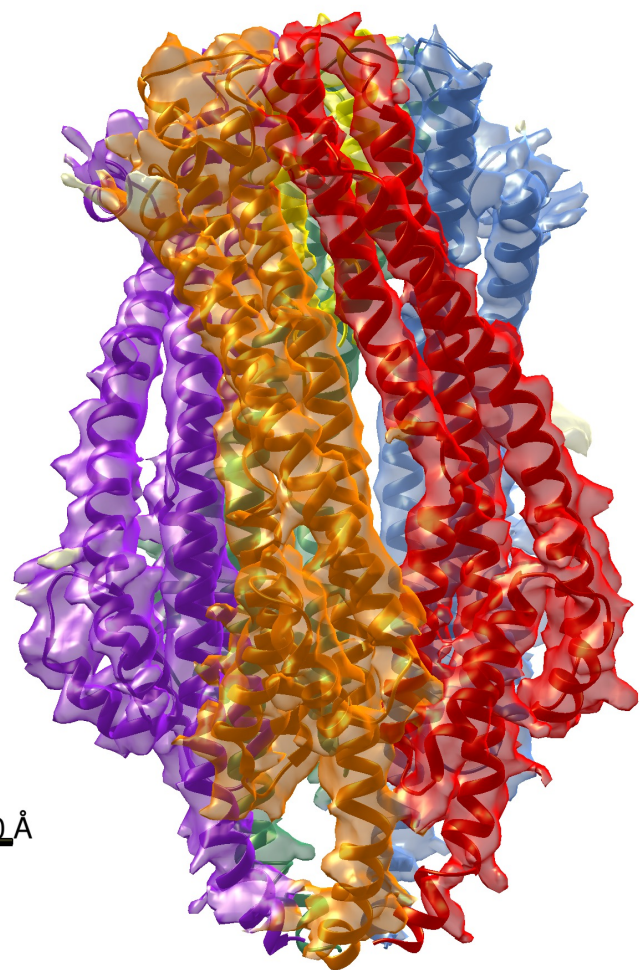

B

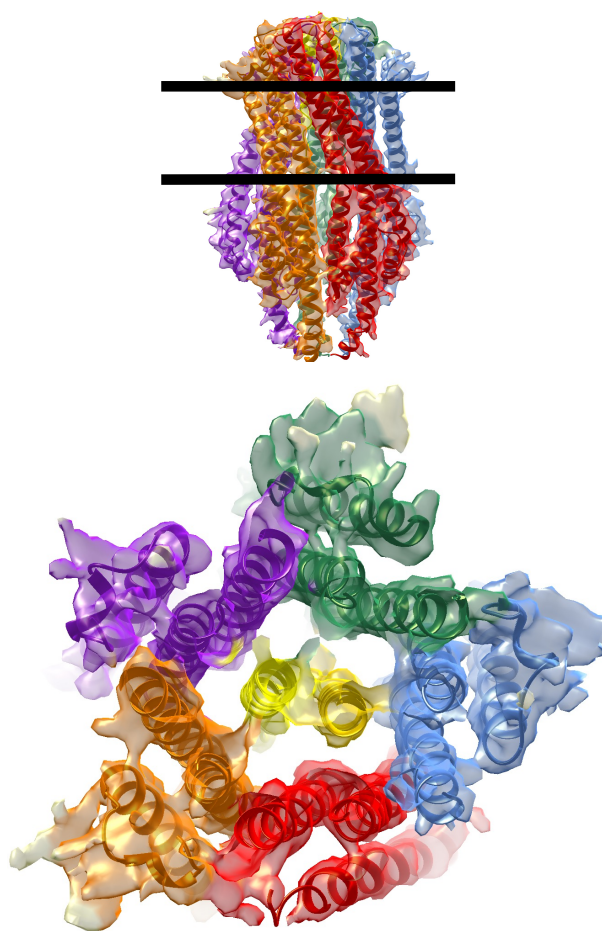

C

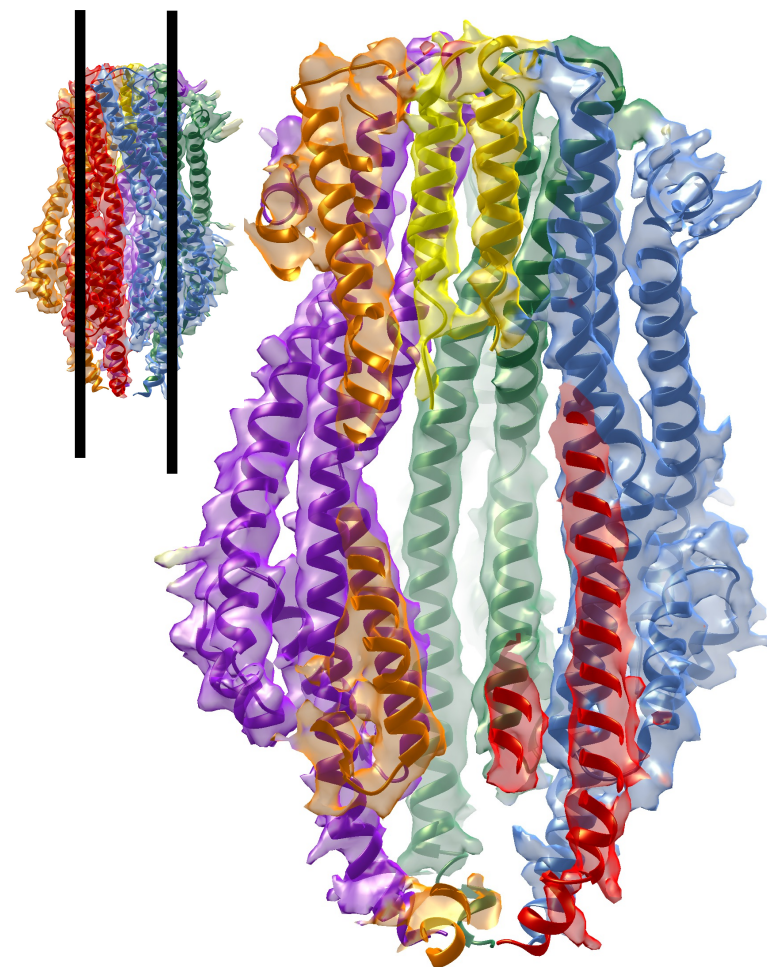

Figure 8

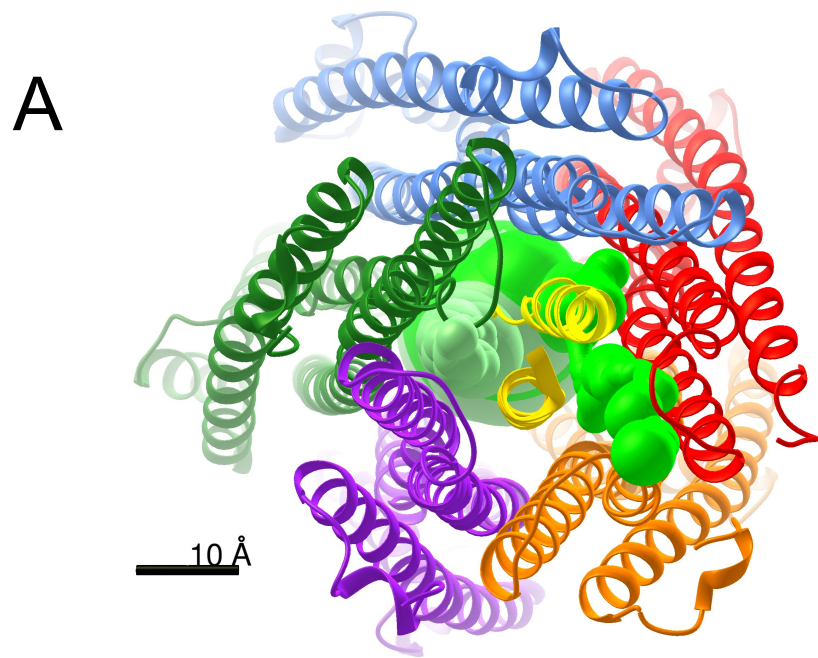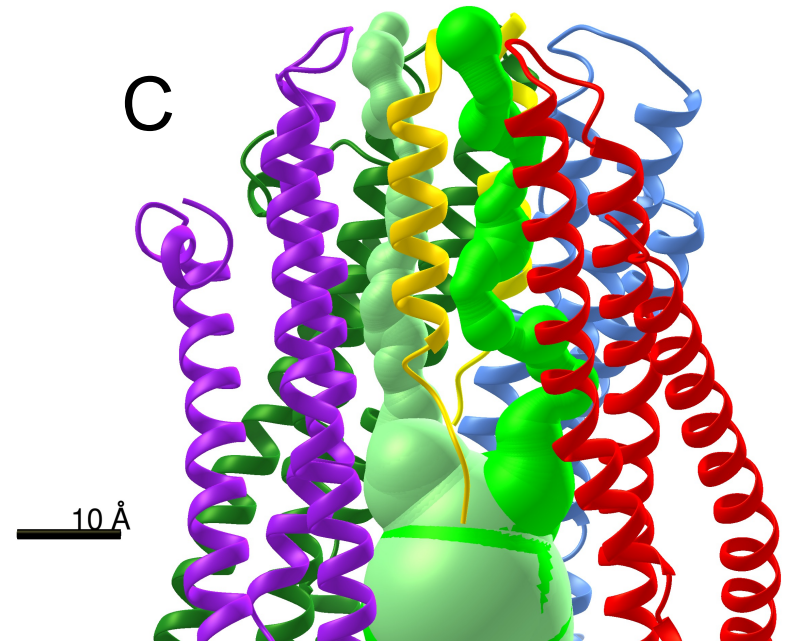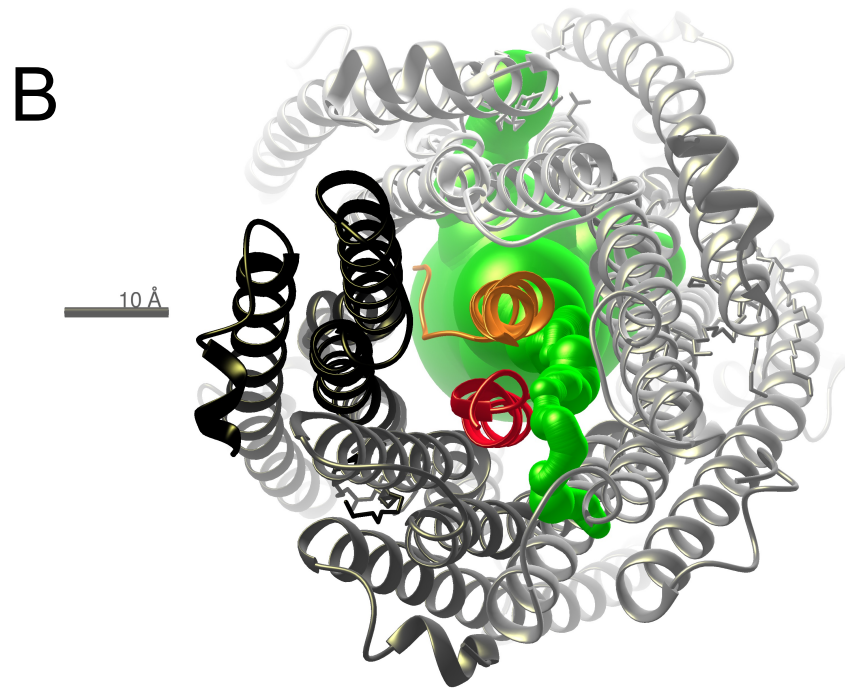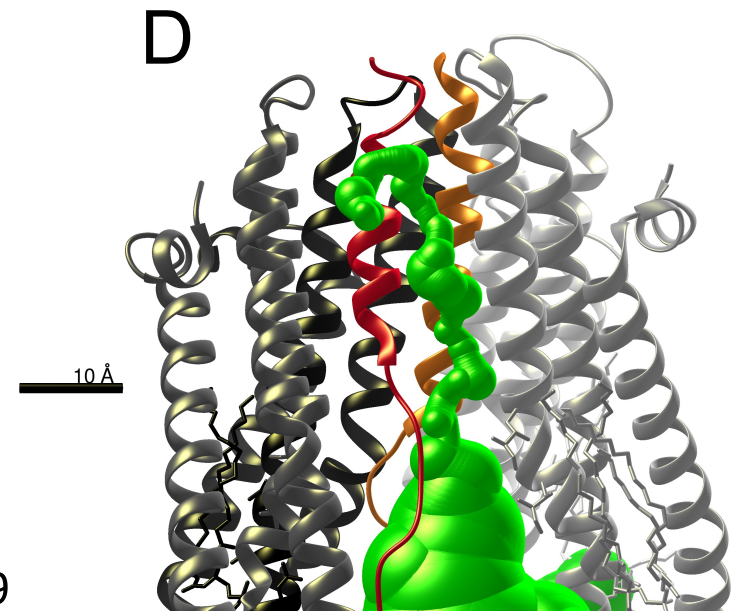

Figure 9

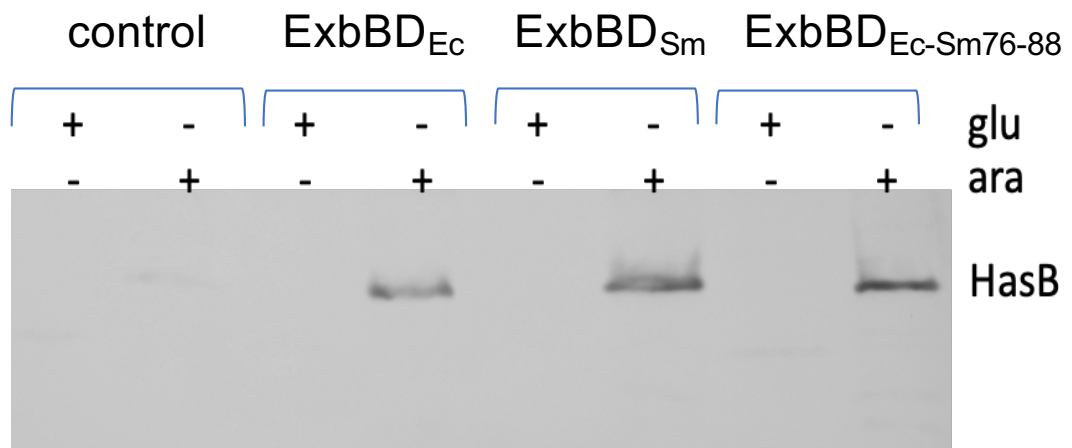

Figure 10



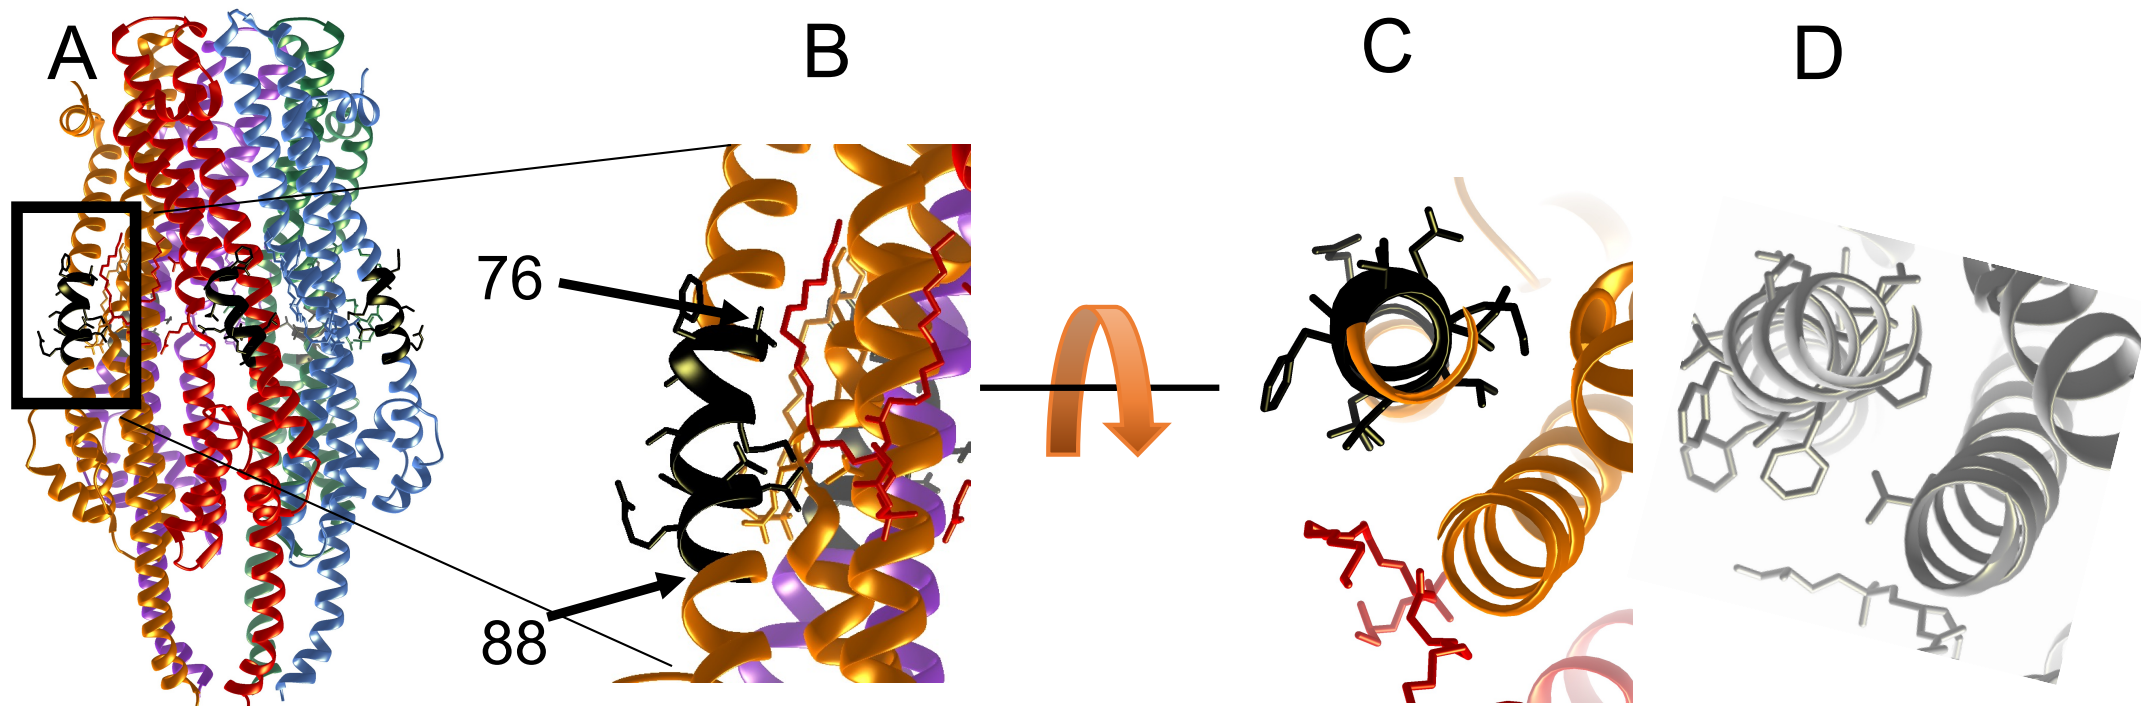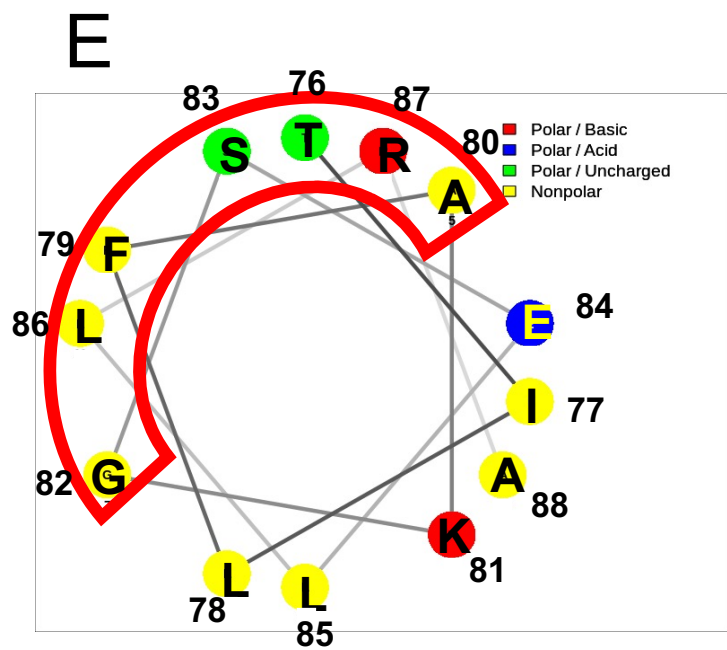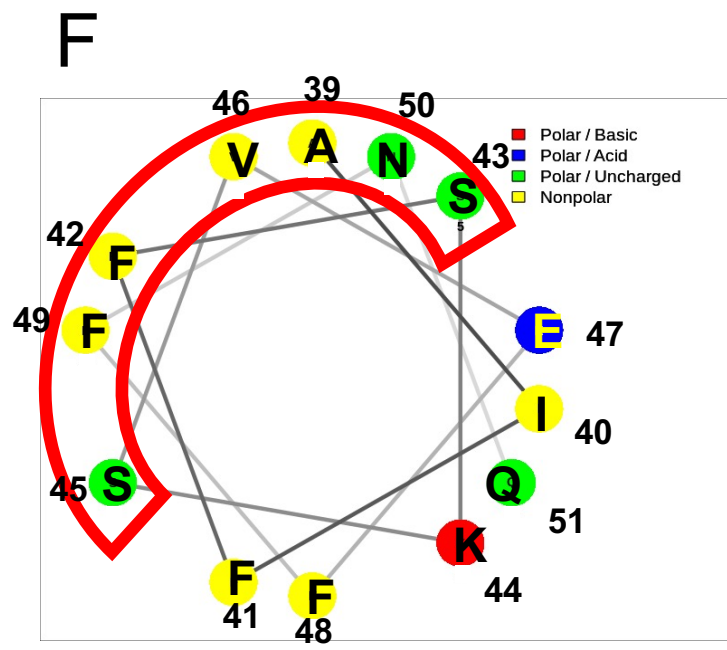

Figure 11
